# Supplementary material for: Common but Nonpersistent Acquisitions of Plant Viruses by Plant-Associated Fungi
Source: MDPI journal article supplement (doi:10.3390/v14102279), 2022-10-17
Supplement: s1 [file s1]

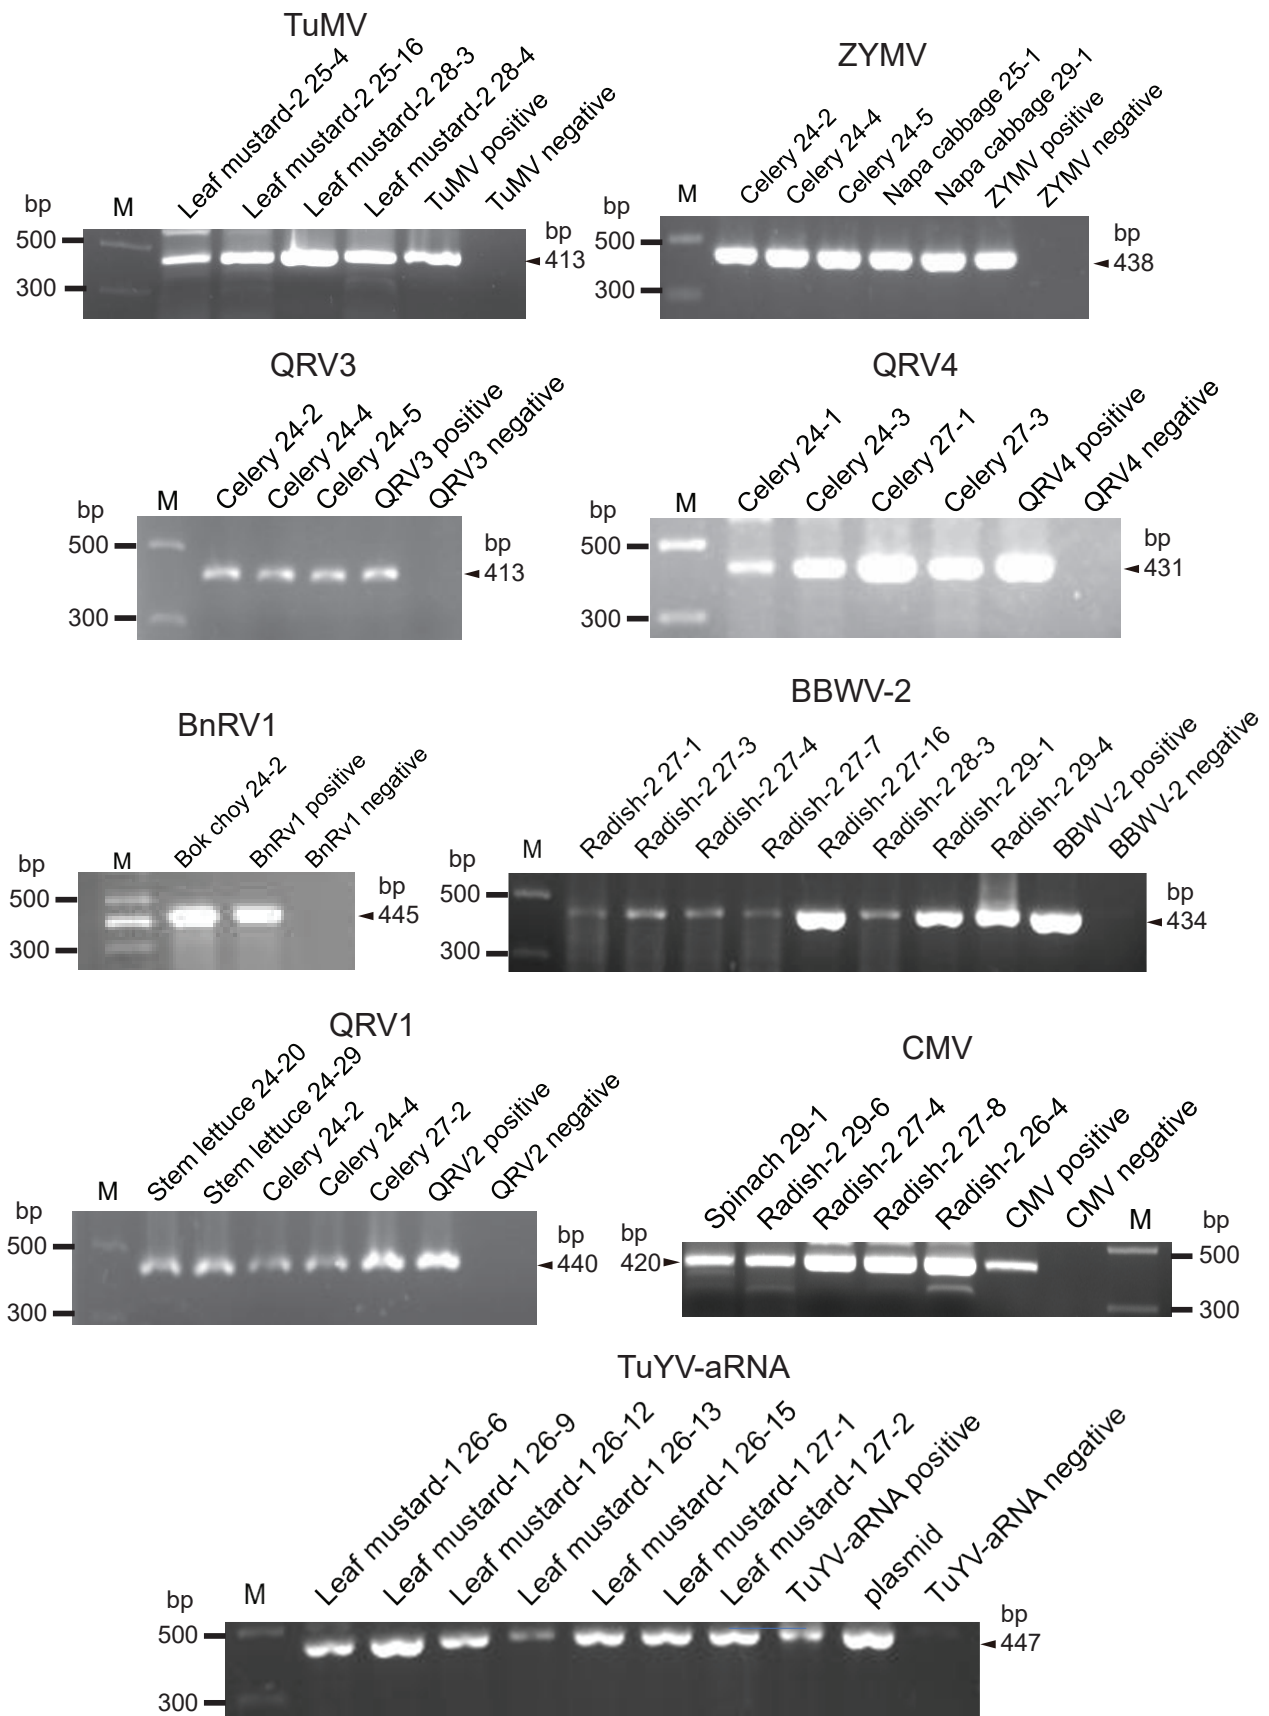

Figure S2. Nested RT-PCR detection of plant viruses in the fungal strains isolated from the leaf samples.
