# Supplementary material for: Common but Nonpersistent Acquisitions of Plant Viruses by Plant-Associated Fungi
Source: MDPI journal article supplement (doi:10.3390/v14102279), 2022-10-17
Supplement: s1 [file s1]

Supplementary Table 1. A list of primers used in this study.

| Virus primer | Sequence              | Product size (bp) |
|--------------|-----------------------|-------------------|
| BnRV1-F      | ATCCTAGTTACTGTGCTAAT  | 738               |
| BnRV1-R      | CGTAACGTACCCTTAAAATC  |                   |
| PRSV-F       | AACCCGAGCTTGTGGAGCCC  | 780               |
| PRSV-R       | TGATCAATTTCGACAGGGATG |                   |
| WMV-F        | ATCAATGAAGCAAGTTAGTC  | 738               |
| WMV-R        | ACAAAGTACGGTAGTGTAGT  |                   |
| ZYMV-F       | TCGTATTGAGCAGGATGAAG  | 738               |
| ZYMV-R       | AAGGTTGCTGCTAACTCACC  |                   |
| KoMV-F       | ACCTCCAAAACTCCTCAAC   | 760               |
| KoMV-R       | ACTTAATGAGTTTAAATGCGG |                   |
| QRV3-F       | ATTGAAGGTTTATGTTGTTT  | 738               |
| QRV3-R       | GACTCTTTATCTTTCTTCT   |                   |
| QRV4-F       | ACTCACAGCAAACTTTGTGT  | 738               |
| QRV4-R       | TTGTCAGACTTATCTATGTC  |                   |
| TuMV-F       | ATTTGCTCATGTCACTGGTG  | 738               |
| TuMV-R       | TTCTTGGTAATGTAACGGTG  |                   |
| BBWV-2-F     | GATTTCAGGATCAATCAAGA  | 738               |
| BBWV-2-R     | CCCAGAAGAATTGTGAGATC  |                   |
| QRV1-F       | ATCTTGAACAGTACGCTATC  | 742               |
| QRV1-R       | CTTGTGTTACAGGCTTCATT  |                   |
| Ixeridium-F  | ATTCCAGTCGTAGCTGGCAC  | 738               |
| Ixeridium-R  | TGGACTCCATTGCCTGTTGA  |                   |
| QRV2-F       | AAGTTCAGTCTTGAGAATTG  | 738               |
| QRV2-R       | TGCCCCACTATAAGCAAGT   |                   |
| CMV-F        | ATGCGCCACGCGGAACGTTT  | 738               |
| CMV-R        | CATCCACGCTTTCTTATCAT  |                   |
| BrYV-F       | ATCGAGCTTCGCTTGTTTAT  | 738               |
| BrYV-R       | AGTGGTCGAACAGATTCCG   |                   |
| TuYV-aRNA-F  | ATCTGGGCTCATCGGGGAGG  | 738               |
| TuYV-aRNA-R  | GTTGAGGATAGTATAGATAG  |                   |

| Virus primer (nested PCR) | Sequence               | Product size (bp) |
|---------------------------|------------------------|-------------------|
| BnRV1-CF                  | GTGTCAGTCCGTAATCCCTAA  | 445               |
| BnRV1-CR                  | TTGCTTGAGAAGAAGTCCC    |                   |
| ZYMV-CF                   | GTTTGCGATCACCGTTCT     | 438               |
| ZYMV-CR                   | CAATCCCGTCGTCGTCTC     |                   |
| QRV3-CF                   | TCTAAGCAATCTGTCATC     | 413               |
| QRV3-CR                   | CTCCCATCATAAGAAGTA     |                   |
| QRV4-1338-CR              | ATTCAGGTCATTAGGTGTTCC  | 431               |
| QRV4-908-CF               | TATTTATGGTTGCGGTCC     |                   |
| TuMV-CF                   | GTAATGTAACGGTGAAGCAGG  | 413               |
| TuMV-CR                   | TGTTTCGCTGTATGGAGTTGA  |                   |
| BBWV-2-CF                 | CGCAGCTACGTGTATTGTC    | 434               |
| BBWV-2-CR                 | CGAAATAAATCATGTCCCTC   |                   |
| QRV1-CF                   | TTCTGACTTATCCGATGTTTCT | 440               |
| QRV1-CR                   | ATCAGTTTGACCTCCGTTG    |                   |
| CMV-CF                    | TGGGCTTTAGAGGATTATGTG  | 420               |
| CMV-CR                    | TGAGTTCGGGTGGGCATA     |                   |
| BrYV-CF                   | AGTGTTCCCTCCTCGGGTTG   | 432               |
| BrYV-CR                   | CGAAAGCGATGAAGACACCAA  |                   |
| TuYV-aRNA-CF              | ACCAACCGCCAACCTCGTC    | 447               |
| TuYV-aRNA-CR              | GCAGGGAGCGCAACATAA     |                   |
| Fungal primer             | Sequence               |                   |
| ITS1-F                    | TCCGTAGGTGAACCTGCGG    |                   |
| ITS4-R                    | TCCTCCGCTTATTGATATGC   |                   |
| EF1-1018F                 | GAYTTCATCAAGAACATGAT   |                   |
| EF1-1620R                 | GACGTTGAADCCRACRTTGTC  |                   |
