# Supplementary material for: Common but Nonpersistent Acquisitions of Plant Viruses by Plant-Associated Fungi
Source: MDPI journal article supplement (doi:10.3390/v14102279), 2022-10-17
Supplement: s1 [file s1]

**CMV RNA1 (1a)**

CLUSTAL format alignment by MAFFT (v7.505) samples, plant:sPI-13;  
 fungus:Radish-2 27-4

```

plant      GGCTTTAGAGGATTATGTG (CMV-CF:5' primer)
fungus     ggcttttaggactgtgtgaagcgtatgaacgctcacggaaccactattttgaagggaacg
          -----agggaaacg
          *****

plant      atgatgttcgatggtgctatgatgtttgacgaccaagggtgtaatacccgaaacttaactgt
fungus     atgatgttcgatggtgctatgatgtttgacgaccaagggtgtaatacccgaaacttaactgt
          *****

plant      cagtggagaaagatcaggagtgctttctctgaaactgaagcgtcacaccgctgactgag
fungus     cagtggagaaagatcaggagtgctttctctgaaactgaagcgtcacaccgctgactgag
          *****

plant      aaactcaattccacaatatctcccgcgtgcgtaaatcaagactatggtggctttcgt
fungus     aaactcaattccacaatatctcccgcgtgcgtaaatcaagactatggtggctttcgt
          *****

plant      ttatcaacgagcttactatgtcttatgtacatgattgggagaataaaaatttttctc
fungus     ttatcaacgagcttactatgtcttatgtacatgattgggagaataaaaatttttctc
          *****

plant      acggatcagacttattcataccgagggatgacctatggattgagcgggtgcgttattcac
fungus     acggatcagacttattcataccgagggatgacctatggattgagcgggtgcgttattcac
          *****

plant      gctggattatgacgtataagatcattggtgtacctgggatgtgccacccgaactca
fungus     gctggattatgacgtataagatcattggtgtacctgggatgtgccacccgaactca
          *****
                                TATGCCCAACCGAACTCA
                                (CMV-CR:3' primer)

```

**CMV RNA3 (MP)**

CLUSTAL format alignment by MAFFT (v7.505) Samples, plant:Radish-2;  
 fungus:Radish-2 27-4

```

Plants     AGGCATGCTTCCAAGGTAC (CM-R3-119-F:5' primer)
fungus     ttccaaggtaccagcaggactttaacccaacagtcct
          ttccaaggtaccagcaggactttaacccaacagtcct
          *****

Plants     cagcggctacgtctgacgaactcaaaagataattattagccctgatgccatcaagaaaa
fungus     cagcggctacgtctgacgatcttcaaaagataattattagccctgaagccattaagaaaa
          *****

Plants     tggctgctgagtgtagcttaggcggcatcattggatgcgtgctgataatgcgatttcag
fungus     tggctactgagtgtagcttaggcggcatcattggatgcgcgctgataatgcatttcag
          *****

Plants     tcgggcccctcggtccgaagtaaccacggctgattgcttctctttaagtcctggat
fungus     tcgggcccctcggtccgaagtaaccacggctgattgcttctctttaagtcctggat
          *****

Plants     atgatgctgggtaattgtgctctaaaggatacatgagcgtccctcaagtggtgtgctg
fungus     atgatgttggtgaattatgctcaaaaggatacatgagtgctccctcaagtggttatgctg
          *****

Plants     ttactgaacagctctccactgatgctgaagggtctctgagaattacctaagctgatttag
fungus     ttactgaacagcttccactgatgctgaagggtctctgagaattacttagctgactg
          *****

Plants     gcgataaggagctatctcccatagataagcagtcgctcacattacataaccatgatcttc
fungus     gcgacaaggagttatctcccatagatgggcaatgcgttctggtacataaccatgatcttc
          *****

Plants     ccgcttttagtgctttccaaccgacgtatgattgtcccatggagacagttgggaatcgga
fungus     ccgcttttggtgctttccaaccgacgtatgattgtcctatggaaacagttgggaatcgta
          *****

Plants     agcgggtgttttgacgtgtcatcgaaagacatggttatattgggtataccggcaccacag
fungus     agcgggtgttttgctgtcggtatcgaaagacatggttatattgggtataccgggtaccacag
          *****

Plants     ctacgctgtgtagtaattggcaagcaggtttctctagaataaacaactacactcata
fungus     ctacgctgtgtagtaattggcaagcaggtttctcacaagaataacaactacactcata
          *****

Plants     tcgcagctgggaagactctagtactgccattcaacagattagctgagcaaacgaaaacc
fungus     tcgcagctgggaagactctagtactgcc-----
          *****
                                GCTGAGCAAACGAAACGTCAG
                                (CM-R3-769-R :3' primer)

```

CLUSTAL format alignment by MAFFT (v7.505)

```

Plants     ...SSAATSDELQKILFSPDAIKKMAECDLGRHHWMRADNAISVRPLVPEVTHGRIASFFKS
fungus     ..SSAATSDDLQKILFSPDAIKKMAECDLGRHHWMRADNAISVRPLVPEVTHGRIASFFKS
          *****

Plants     GYDAGELCSKGYMSVPQVLCVIRIVSTDAEGSLRIYLDLGDKELSPIDQCVTLHNHD
fungus     GYDVGELCSKGYMSVPQVLCVIRIVSTDAEGSLRIYLDLGDKELSPIDQCVSLHNHD
          *****

Plants     LPALVSFQPTYDCPMETVGNRKRCFAVIERHGYIGYTGTTASVCSNMQARFSSKNNNYTHIAAGKTLV...
fungus     LPALVSFQPTYDCPMETVGNRKRCFAVIERHGYIGYTGTTASVCSNMQARFSSKNNNYTHIAAGKTLV...
          *****

```

Figure S3. Alignment of partial nucleotide and amino acid sequences of CMV RNA1 (1a coding region) and CMV RNA3 (movement protein-coding region) derived from virus strains detected in plants and fungi.
