# Supplementary material for: Common but Nonpersistent Acquisitions of Plant Viruses by Plant-Associated Fungi
Source: MDPI journal article supplement (doi:10.3390/v14102279), 2022-10-17
Supplement: s1 [file s1]

## ***Sarocladium kiliense***

### **ITS sequences**

>Bok choy 24-10

TTGTGAACATACCTATCGTTCCCTCGGCGGGCTCAGCGCGCGGTGCCTCCGGGCTCCGGGCGTCCGCCGGGGGA  
CAACCAAACCTCTGATTTTATTGTGAATCTCTGAGGGGCGAAAGCCCCGACAACAAAATGAATCAAACTTTCAA  
CAACGGATCTCTTGGCTCTGGCATCGATGAAGAACGCAGCGAAATGCGATAAGTAATGTGAATTGCAGAATTC  
AGTGAATCATCGAATCTTTGAACGCACATTGCGCCCGCCGGCACTCCGGCGGGCATGCCTGTCCGAGCGTCAT  
TTCAACCCTCAGGACCCCCCTTTCGGGGGGGACCTGGTGCTGGGGATCAGCGGCCTCCGGGCCCCCTGTCCCCCA  
AATTGAGTGGCGGTGCGCGCCGCAGCCTCCCCTGCGTAGTAGCACACCTCGCACCGGAGAGCGGCTCGGCCACG  
CCGTGAAACCCCCAATTTTTTAAGGTTGACCTCGGATCAGGTAGGAATACCCGCTGAACTTAAGCATAT

>Bok choy 24-11

TTGTGAACATACCTATCGTTCCCTCGGCGGGCTCAGCGCGCGGTGCCTCCGGGCTCCGGGCGTCCGCCGGGGGA  
CAACCAAACCTCTGATTTTATTGTGAATCTCTGAGGGGCGAAAGCCCCGACAACAAAATGAATCAAACTTTCAA  
CAACGGATCTCTTGGCTCTGGCATCGATGAAGAACGCAGCGAAATGCGATAAGTAATGTGAATTGCAGAATTC  
AGTGAATCATCGAATCTTTGAACGCACATTGCGCCCGCCGGCACTCCGGCGGGCATGCCTGTCCGAGCGTCAT  
TTCAACCCTCAGGACCCCCCTTTCGGGGGGGACCTGGTGCTGGGGATCAGCGGCCTCCGGGCCCCCTGTCCCCCA  
AATTGAGTGGCGGTGCGCGCCGCAGCCTCCCCTGCGTAGTAGCACACCTCGCACCGGAGAGCGGCTCGGCCACG  
CCGTGAAACCCCCAATTTTTTAAGGTTGACCTCGGATCAGGTAGGAATACCCGCTGAACTTAAGCATAT

>Bok choy 24-12

TTGTGAACATACCTATCGTTCCCTCGGCGGGCTCAGCGCGCGGTGCCTCCGGGCTCCGGGCGTCCGCCGGGGGA  
CAACCAAACCTCTGATTTTATTGTGAATCTCTGAGGGGCGAAAGCCCCGACAACAAAATGAATCAAACTTTCAA  
CAACGGATCTCTTGGCTCTGGCATCGATGAAGAACGCAGCGAAATGCGATAAGTAATGTGAATTGCAGAATTC  
AGTGAATCATCGAATCTTTGAACGCACATTGCGCCCGCCGGCACTCCGGCGGGCATGCCTGTCCGAGCGTCAT  
TTCAACCCTCAGGACCCCCCTTTCGGGGGGGACCTGGTGCTGGGGATCAGCGGCCTCCGGGCCCCCTGTCCCCCA  
AATTGAGTGGCGGTGCGCGCCGCAGCCTCCCCTGCGTAGTAGCACACCTCGCACCGGAGAGCGGCTCGGCCACG  
CCGTGAAACCCCCAATTTTTTAAGGTTGACCTCGGATCAGGTAGGAATACCCGCTGAACTTAAGCATAT

>Bok choy 24-13

TTGTGAACATACCTATCGTTCCCTCGGCGGGCTCAGCGCGCGGTGCCTCCGGGCTCCGGGCGTCCGCCGGGGGA  
CAACCAAACCTCTGATTTTATTGTGAATCTCTGAGGGGCGAAAGCCCCGACAACAAAATGAATCAAACTTTCAA  
CAACGGATCTCTTGGCTCTGGCATCGATGAAGAACGCAGCGAAATGCGATAAGTAATGTGAATTGCAGAATTC  
AGTGAATCATCGAATCTTTGAACGCACATTGCGCCCGCCGGCACTCCGGCGGGCATGCCTGTCCGAGCGTCAT  
TTCAACCCTCAGGACCCCCCTTTCGGGGGGGACCTGGTGCTGGGGATCAGCGGCCTCCGGGCCCCCTGTCCCCCA  
AATTGAGTGGCGGTGCGCGCCGCAGCCTCCCCTGCGTAGTAGCACACCTCGCACCGGAGAGCGGCTCGGCCACG  
CCGTGAAACCCCCAATTTTTTAAGGTTGACCTCGGATCAGGTAGGAATACCCGCTGAACTTAAGCATAT

>Celery 24-1

TTGTGAACATACCTATCGTTCCCTCGGCGGGCTCAGCGCGCGGTGCCTCCGGGCTCCGGGCGTCCGCCGGGGGA  
CAACCAAACCTCTGATTTTATTGTGAATCTCTGAGGGGCGAAAGCCCCGACAACAAAATGAATCAAACTTTCAA  
CAACGGATCTCTTGGCTCTGGCATCGATGAAGAACGCAGCGAAATGCGATAAGTAATGTGAATTGCAGAATTC  
AGTGAATCATCGAATCTTTGAACGCACATTGCGCCCGCCGGCACTCCGGCGGGCATGCCTGTCCGAGCGTCAT  
TTCAACCCTCAGGACCCCCCTTTCGGGGGGGACCTGGTGCTGGGGATCAGCGGCCTCCGGGCCCCCTGTCCCCCA  
AATTGAGTGGCGGTGCGCGCCGCAGCCTCCCCTGCGTAGTAGCACACCTCGCACCGGAGAGCGGCTCGGCCACG  
CCGTGAAACCCCCAATTTTTTAAGGTTGACCTCGGATCAGGTAGGAATACCCGCTGAACC

>Celery 24-2

TTGTGAACATACCTATCGTTCCCTCGGCGGGCTCAGCGCGCGGTGCCTCCGGGCTCCGGGCGTCCGCCGGGGGA  
CAACCAAACCTCTGATTTTATTGTGAATCTCTGAGGGGCGAAAGCCCCGACAACAAAATGAATCAAACTTTCAA  
CAACGGATCTCTTGGCTCTGGCATCGATGAAGAACGCAGCGAAATGCGATAAGTAATGTGAATTGCAGAATTC  
AGTGAATCATCGAATCTTTGAACGCACATTGCGCCCGCCGGCACTCCGGCGGGCATGCCTGTCCGAGCGTCAT  
TTCAACCCTCAGGACCCCCCTTTCGGGGGGGACCTGGTGCTGGGGATCAGCGGCCTCCGGGCCCCCTGTCCCCCA  
AATTGAGTGGCGGTGCGCGCCGCAGCCTCCCCTGCGTAGTAGCACACCTCGCACCGGAGAGCGGCTCGGCCACG  
CCGTGAAACCCCCAATTTTTTAAGGTTGACCTCGGATCAGGTAGGAATACCCGCTGAACTTAAG

>Celery 24-4

TTGTGACATACCTATCGTTCCCTCGGCGGGCTCAGCGCGCGGTGCCTCCGGGCTCCGGGCGTCCGCCGGGGGAC  
AACCAAACCTCTGATTTTATTGTGAATCTCTGAGGGGCGAAAGCCCCGACAACAAAATGAATCAAACTTTCAAC  
AACGGATCTCTTGGCTCTGGCATCGATGAAGAACGCAGCGAAATGCGATAAGTAATGTGAATTGCAGAATTCA  
GTGAATCATCGAATCTTTGAACGCACATTGCGCCCGCCGGCACTCCGGCGGGCATGCCTGTCCGAGCGTCATT  
TCAACCCTCAGGACCCCCCTTTCGGGGGGGACCTGGTGCTGGGGATCAGCGGCCTCCGGGCCCCCTGTCCCCCA

ATTGAGTGGCGGTTCGCGCCGCAGCCTCCCCTGCGTAGTAGCACACCTCGCACCGGAGAGCGGCTCGGCCACGC  
CGTGAAACCCCCAATTTTTTAAGGTTGACCTCGGATCAGGTAGGAATACCCGCTGAACTTAAGCA

>Celery 24-5

TTGTGAACATACCTATCGTTCCCTCGGCGGGCTCAGCGCGCGGTGCCTCCGGGCTCCGGGCGTCCGCCGGGGA  
CAACCAAACCTCTGATTTTTATTGTGAATCTCTGAGGGGCGAAAGCCCCGACAACAAAATGAATCAAACTTTCAA  
CAACGGATCTCTTGGCTCTGGCATCGATGAAGAACGCAGCGAAATGCGATAAGTAATGTGAATTGCAGAATTC  
AGTGAATCATCGAATCTTTGAACGCACATTGCGCCCGCCGGCACTCCGGCGGGCATGCCTGTCCGAGCGTCAT  
TTCAACCCTCAGGACCCCCCTTTCGGGGGGGACCTGGTGCTGGGGATCAGCGGCCTCCGGGCCCCCTGTCCCCCA  
AATTGAGTGGCGGTTCGCGCCGCAGCCTCCCCTGCGTAGTAGCACACCTCGCACCGGAGAGCGGCTCGGCCACG  
CCGTGAAACCCCCAATTTTTTAAGGTTGACCTCGGATCAGGTAGGAATACCCGCTGAACTTAAGCA

>Celery 27-3

TTGTGAACATACCTATCGTTCCCTCGGCGGGCTCAGCGCGCGGTGCCTCCGGGCTCCGGGCGTCCGCCGGGGA  
CAACCAAACCTCTGATTTTTATTGTGAATCTCTGAGGGGCGAAAGCCCCGACAACAAAATGAATCAAACTTTCAA  
CAACGGATCTCTTGGCTCTGGCATCGATGAAGAACGCAGCGAAATGCGATAAGTAATGTGAATTGCAGAATTC  
AGTGAATCATCGAATCTTTGAACGCACATTGCGCCCGCCGGCACTCCGGCGGGCATGCCTGTCCGAGCGTCAT  
TTCAACCCTCAGGACCCCCCTTTCGGGGGGGACCTGGTGCTGGGGATCAGCGGCCTCCGGGCCCCCTGTCCCCCA  
AATTGAGTGGCGGTTCGCGCCGCAGCCTCCCCTGCGTAGTAGCACACCTCGCACCGGAGAGCGGCTCGGCCACG  
CCGTGAAACCCCCAATTTTTTAAGGTTGACCTCGGATCAGGTAGGAATACCCGCTGAACTTAAGCATAT

>Leaf mustard-1 26-6

TACCTATCGTTCCCTCGGCGGGCTCAGCGCGCGGTGCCTCCGGGCTCCGGGCGTCCGCCGGGGACAACCAAAC  
TCTGATTTTTATTGTGAATCTCTGAGGGGCGAAAGCCCCGACAACAAAATGAATCAAACTTTCAACAACGGATC  
TCTTGGCTCTGGCATCGATGAAGAACGCAGCGAAATGCGATAAGTAATGTGAATTGCAGAATTCAGTGAATCA  
TCGAATCTTTGAACGCACATTGCGCCCGCCGGCACTCCGGCGGGCATGCCTGTCCGAGCGTCATTTCAACCCT  
CAGGACCCCCCTTTCGGGGGGGACCTGGTGCTGGGGATCAGCGGCCTCCGGGCCCCCTGTCCCCCAAATTGAGTG  
GCGGTTCGCGCCGCAGCCTCCCCTGCGTAGTAGCACACCTCGCACCGGAGAGCGGCTCGGCCACGCCGTGAAAC  
CCCCAATTTTTTAAGGTTGACCTCGGATCAGGTAGGAATACCCGCTGAACTTAAGCATAT

>Leaf mustard-1 26-12

TTGTGAACATACCTATCGTTCCCTCGGCGGGCTCAGCGCGCGGTGCCTCCGGGCTCCGGGCGTCCGCCGGGGA  
CAACCAAACCTCTGATTTTTATTGTGAATCTCTGAGGGGCGAAAGCCCCGACAACAAAATGAATCAAACTTTCAA  
CAACGGATCTCTTGGCTCTGGCATCGATGAAGAACGCAGCGAAATGCGATAAGTAATGTGAATTGCAGAATTC  
AGTGAATCATCGAATCTTTGAACGCACATTGCGCCCGCCGGCACTCCGGCGGGCATGCCTGTCCGAGCGTCAT  
TTCAACCCTCAGGACCCCCCTTTCGGGGGGGACCTGGTGCTGGGGATCAGCGGCCTCCGGGCCCCCTGTCCCCCA  
AATTGAGTGGCGGTTCGCGCCGCAGCCTCCCCTGCGTAGTAGCACACCTCGCACCGGAGAGCGGCTCGGCCACG  
CCGTGAAACCCCCAATTTTTTAAGGTTGACCTCGGATCAGGTAGGAATACCCGCTGAACTTAAGCATAT

>Leaf mustard-1 26-13

TTGTGAACATACCTATCGTTCCCTCGGCGGGCTCAGCGCGCGGTGCCTCCGGGCTCCGGGCGTCCGCCGGGGA  
CAACCAAACCTCTGATTTTTATTGTGAATCTCTGAGGGGCGAAAGCCCCGACAACAAAATGAATCAAACTTTCAA  
CAACGGATCTCTTGGCTCTGGCATCGATGAAGAACGCAGCGAAATGCGATAAGTAATGTGAATTGCAGAATTC  
AGTGAATCATCGAATCTTTGAACGCACATTGCGCCCGCCGGCACTCCGGCGGGCATGCCTGTCCGAGCGTCAT  
TTCAACCCTCAGGACCCCCCTTTCGGGGGGGACCTGGTGCTGGGGATCAGCGGCCTCCGGGCCCCCTGTCCCCCA  
AATTGAGTGGCGGTTCGCGCCGCAGCCTCCCCTGCGTAGTAGCACACCTCGCACCGGAGAGCGGCTCGGCCACG  
CCGTGAAACCCCCAATTTTTTAAGGTTGACCTCGGATCAGGTAGGAATACCCGCTGAAC

>Leaf mustard-1 26-15

TTGTGAACATACCTATCGTTCCCTCGGCGGGCTCAGCGCGCGGTGCCTCCGGGCTCCGGGCGTCCGCCGGGGA  
CAACCAAACCTCTGATTTTTATTGTGAATCTCTGAGGGGCGAAAGCCCCGACAACAAAATGAATCAAACTTTCAA  
CAACGGATCTCTTGGCTCTGGCATCGATGAAGAACGCAGCGAAATGCGATAAGTAATGTGAATTGCAGAATTC  
AGTGAATCATCGAATCTTTGAACGCACATTGCGCCCGCCGGCACTCCGGCGGGCATGCCTGTCCGAGCGTCAT  
TTCAACCCTCAGGACCCCCCTTTCGGGGGGGACCTGGTGCTGGGGATCAGCGGCCTCCGGGCCCCCTGTCCCCCA  
AATTGAGTGGCGGTTCGCGCCGCAGCCTCCCCTGCGTAGTAGCACACCTCGCACCGGAGAGCGGCTCGGCCACG  
CCGTGAAACCCCCAATTTTTTAAGGTTGACCTCGGATCAGGTAGGAATACCCGCTGAACTTAAG

>Leaf mustard-2 25-4

TACCTATCGTTCCCTCGGCGGGCTCAGCGCGCGGTGCCTCCGGGCTCCGGGCGTCCGCCGGGGACAACCAAAC  
TCTGATTTTTATTGTGAATCTCTGAGGGGCGAAAGCCCCGACAACAAAATGAATCAAACTTTCAACAACGGATC  
TCTTGGCTCTGGCATCGATGAAGAACGCAGCGAAATGCGATAAGTAATGTGAATTGCAGAATTCAGTGAATCA  
TCGAATCTTTGAACGCACATTGCGCCCGCCGGCACTCCGGCGGGCATGCCTGTCCGAGCGTCATTTCAACCCT  
CAGGACCCCCCTTTCGGGGGGGACCTGGTGCTGGGGATCAGCGGCCTCCGGGCCCCCTGTCCCCCAAATTGAGTG  
GCGGTTCGCGCCGCAGCCTCCCCTGCGTAGTAGCACACCTCGCACCGGAGAGCGGCTCGGCCACGCCGTGAAAC  
CCCCAATTTTTTAAGGTTGACCTCGGATCAGGTAGGAATACCCGCTGAACTTAAGCATATCAAA

>Leaf mustard-2 25-17

TGACATACCTATCGTTCCCTCGGCGGGCTCAGCGCGCGGTGCCTCCGGGCTCCGGGCGTCCGCCGGGGACAAC  
CAAACCTCTGATTTTATTGTGAATCTCTGAGGGGCGAAAGCCCGACAACAAAATGAATCAAACTTTCAACAAC  
GGATCTCTTGGCTCTGGCATCGATGAAGAACGCAGCGAAATGCGATAAGTAATGTGAATTGCAGAATTCAGTG  
AATCATCGAATCTTTGAACGCACATTGCGCCCGCCGGCACTCCGGCGGGCATGCCTGTCCGAGCGTCATTTCA  
ACCCTCAGGACCCCCCTTTCTGGGGGGGACCTGGTGCTGGGGATCAGCGGCCTCCGGGCCCCCTGTCCCCCAAATT  
GAGTGGCGGTTCGCGCCGCAGCCTCCCCTGCGTAGTAGCACACCTCGCACCCGAGAGCGGCTCGGCCACGCCGT  
GAAACCCCCAATTTTTTTAAGGTTGACCTCGGATCAGGTAGGAATACCCGCTGAACTTAAGCA

>Leaf mustard-2 28-3

TGACATACCTATCGTTCCCTCGGCGGGCTCAGCGCGCGGTGCCTCCGGGCTCCGGGCGTCCGCCGGGGACAAC  
CAAACCTCTGATTTTATTGTGAATCTCTGAGGGGCGAAAGCCCGACAACAAAATGAATCAAACTTTCAACAAC  
GGATCTCTTGGCTCTGGCATCGATGAAGAACGCAGCGAAATGCGATAAGTAATGTGAATTGCAGAATTCAGTG  
AATCATCGAATCTTTGAACGCACATTGCGCCCGCCGGCACTCCGGCGGGCATGCCTGTCCGAGCGTCATTTCA  
ACCCTCAGGACCCCCCTTTCTGGGGGGGACCTGGTGCTGGGGATCAGCGGCCTCCGGGCCCCCTGTCCCCCAAATT  
GAGTGGCGGTTCGCGCCGCAGCCTCCCCTGCGTAGTAGCACACCTCGCACCCGAGAGCGGCTCGGCCACGCCGT  
GAAACCCCCAATTTTTTTAAGGTTGACCTCGGATCAGGTAGGAATACCCGCTGAACTTAAGCATAT

>Leaf mustard-2 28-4

TGACATACCTATCGTTCCCTCGGCGGGCTCAGCGCGCGGTGCCTCCGGGCTCCGGGCGTCCGCCGGGGACAAC  
CAAACCTCTGATTTTATTGTGAATCTCTGAGGGGCGAAAGCCCGACAACAAAATGAATCAAACTTTCAACAAC  
GGATCTCTTGGCTCTGGCATCGATGAAGAACGCAGCGAAATGCGATAAGTAATGTGAATTGCAGAATTCAGTG  
AATCATCGAATCTTTGAACGCACATTGCGCCCGCCGGCACTCCGGCGGGCATGCCTGTCCGAGCGTCATTTCA  
ACCCTCAGGACCCCCCTTTCTGGGGGGGACCTGGTGCTGGGGATCAGCGGCCTCCGGGCCCCCTGTCCCCCAAATT  
GAGTGGCGGTTCGCGCCGCAGCCTCCCCTGCGTAGTAGCACACCTCGCACCCGAGAGCGGCTCGGCCACGCCGT  
GAAACCCCCAATTTTTTTAAGGTTGACCTCGGATCAGGTAGGAATACCCGCTGAACTTAAGCA

>Napa cabbage 25-1

CATACCTATCGTTCCCTCGGCGGGCTCAGCGCGCGGTGCCTCCGGGCTCCGGGCGTCCGCCGGGGACAACCAA  
ACTCTGATTTTATTGTGAATCTCTGAGGGGCGAAAGCCCGACAACAAAATGAATCAAACTTTCAACAACGGA  
TCTCTTGGCTCTGGCATCGATGAAGAACGCAGCGAAATGCGATAAGTAATGTGAATTGCAGAATTCAGTGAAT  
CATCGAATCTTTGAACGCACATTGCGCCCGCCGGCACTCCGGCGGGCATGCCTGTCCGAGCGTCATTTCAACC  
CTCAGGACCCCCCTTTCTGGGGGGGACCTGGTGCTGGGGATCAGCGGCCTCCGGGCCCCCTGTCCCCCAAATTGAG  
TGGCGGTTCGCGCCGCAGCCTCCCCTGCGTAGTAGCACACCTCGCACCCGAGAGCGGCTCGGCCACGCCGTGAA  
ACCCCAATTTTTTTAAGGTTGACCTCGGATCAGGTAGGAATACCCGCTGAACTTAAGCATATCAA

>Napa cabbage 25-3

TTGTGAACATACCTATCGTTCCCTCGGCGGGCTCAGCGCGCGGTGCCTCCGGGCTCCGGGCGTCCGCCGGGGA  
CAACCAAACCTCTGATTTTATTGTGAATCTCTGAGGGGCGAAAGCCCGACAACAAAATGAATCAAACTTTCAA  
CAACGGATCTCTTGGCTCTGGCATCGATGAAGAACGCAGCGAAATGCGATAAGTAATGTGAATTGCAGAATTC  
AGTGAATCATCGAATCTTTGAACGCACATTGCGCCCGCCGGCACTCCGGCGGGCATGCCTGTCCGAGCGTCAT  
TTCAACCCTCAGGACCCCCCTTTCTGGGGGGGACCTGGTGCTGGGGATCAGCGGCCTCCGGGCCCCCTGTCCCCCA  
AATTGAGTGGCGGTTCGCGCCGCAGCCTCCCCTGCGTAGTAGCACACCTCGCACCCGAGAGCGGCTCGGCCACG  
CCGTGAAACCCCCAATTTTTTTAAGGTTGACCTCGGATCAGGTAGGAATACCCGCTGAACTTAAGCA

>Napa cabbage 26-1

TTGTGAACATACCTATCGTTCCCTCGGCGGGCTCAGCGCGCGGTGCCTCCGGGCTCCGGGCGTCCGCCGGGGA  
CAACCAAACCTCTGATTTTATTGTGAATCTCTGAGGGGCGAAAGCCCGACAACAAAATGAATCAAACTTTCAA  
CAACGGATCTCTTGGCTCTGGCATCGATGAAGAACGCAGCGAAATGCGATAAGTAATGTGAATTGCAGAATTC  
AGTGAATCATCGAATCTTTGAACGCACATTGCGCCCGCCGGCACTCCGGCGGGCATGCCTGTCCGAGCGTCAT  
TTCAACCCTCAGGACCCCCCTTTCTGGGGGGGACCTGGTGCTGGGGATCAGCGGCCTCCGGGCCCCCTGTCCCCCA  
AATTGAGTGGCGGTTCGCGCCGCAGCCTCCCCTGCGTAGTAGCACACCTCGCACCCGAGAGCGGCTCGGCCACG  
CCGTGAAACCCCCAATTTTTTTAAGGTTGACCTCGGATCAGGTAGGAATACCCGCTGAACTTAAGCAT

>Napa cabbage 26-2

TTGTGAACATACCTATCGTTCCCTCGGCGGGCTCAGCGCGCGGTGCCTCCGGGCTCCGGGCGTCCGCCGGGGA  
CAACCAAACCTCTGATTTTATTGTGAATCTCTGAGGGGCGAAAGCCCGACAACAAAATGAATCAAACTTTCAA  
CAACGGATCTCTTGGCTCTGGCATCGATGAAGAACGCAGCGAAATGCGATAAGTAATGTGAATTGCAGAATTC  
AGTGAATCATCGAATCTTTGAACGCACATTGCGCCCGCCGGCACTCCGGCGGGCATGCCTGTCCGAGCGTCAT  
TTCAACCCTCAGGACCCCCCTTTCTGGGGGGGACCTGGTGCTGGGGATCAGCGGCCTCCGGGCCCCCTGTCCCCCA  
AATTGAGTGGCGGTTCGCGCCGCAGCCTCCCCTGCGTAGTAGCACACCTCGCACCCGAGAGCGGCTCGGCCACG  
CCGTGAAACCCCCAATTTTTTTAAGGTTGACCTCGGATCAGGTAGGAATACCCGCTGAACTTAAGCA

>Napa cabbage 27-1

TTGTGAACATACCTATCGTTCCCTCGGCGGGCTCAGCGCGCGGTGCCTCCGGGCTCCGGGCGTCCGCCGGGGGA  
CAACCAAACCTCTGATTTTATTGTGAATCTCTGAGGGGCGAAAGCCCCGACAACAAAATGAATCAAACTTTCAA  
CAACGGATCTCTTGGCTCTGGCATCGATGAAGAACGCAGCGAAATGCGATAAGTAATGTGAATTGCAGAATTC  
AGTGAATCATCGAATCTTTGAACGCACATTGCGCCCGCCGGCACTCCGGCGGGCATGCCTGTCCGAGCGTCAT  
TTCAACCCTCAGGACCCCCCTTTCGGGGGGGACCTGGTGCTGGGGATCAGCGGCCTCCGGGCCCCCTGTCCCCCA  
AATTGAGTGGCGGTTCGCGCCGCAGCCTCCCCTGCGTAGTAGCACACCTCGCACCCGAGAGCGGCTCGGCCACG  
CCGTGAAACCCCCAATTTTTTAAGGTTGACCTCGGATCAGGTAGGAATACCCGCTGAACTTA

>Napa cabbage 27-2

TTGTGAACATACCTATCGTTCCCTCGGCGGGCTCAGCGCGCGGTGCCTCCGGGCTCCGGGCGTCCGCCGGGGGA  
CAACCAAACCTCTGATTTTATTGTGAATCTCTGAGGGGCGAAAGCCCCGACAACAAAATGAATCAAACTTTCAA  
CAACGGATCTCTTGGCTCTGGCATCGATGAAGAACGCAGCGAAATGCGATAAGTAATGTGAATTGCAGAATTC  
AGTGAATCATCGAATCTTTGAACGCACATTGCGCCCGCCGGCACTCCGGCGGGCATGCCTGTCCGAGCGTCAT  
TTCAACCCTCAGGACCCCCCTTTCGGGGGGGACCTGGTGCTGGGGATCAGCGGCCTCCGGGCCCCCTGTCCCCCA  
AATTGAGTGGCGGTTCGCGCCGCAGCCTCCCCTGCGTAGTAGCACACCTCGCACCCGAGAGCGGCTCGGCCACG  
CCGTGAAACCCCCAATTTTTTAAGGTTGACCTCGGATCAGGTAGGAATACCCGCTGAACTTAAGCATAT

>Napa cabbage 27-3

TTGTGAACATACCTATCGTTCCCTCGGCGGGCTCAGCGCGCGGTGCCTCCGGGCTCCGGGCGTCCGCCGGGGGA  
CAACCAAACCTCTGATTTTATTGTGAATCTCTGAGGGGCGAAAGCCCCGACAACAAAATGAATCAAACTTTCAA  
CAACGGATCTCTTGGCTCTGGCATCGATGAAGAACGCAGCGAAATGCGATAAGTAATGTGAATTGCAGAATTC  
AGTGAATCATCGAATCTTTGAACGCACATTGCGCCCGCCGGCACTCCGGCGGGCATGCCTGTCCGAGCGTCAT  
TTCAACCCTCAGGACCCCCCTTTCGGGGGGGACCTGGTGCTGGGGATCAGCGGCCTCCGGGCCCCCTGTCCCCCA  
AATTGAGTGGCGGTTCGCGCCGCAGCCTCCCCTGCGTAGTAGCACACCTCGCACCCGAGAGCGGCTCGGCCACG  
CCGTGAAACCCCCAATTTTTTAAGGTTGACCTCGGATCAGGTAGGAATACCCGCTGAACTTAAGCATAT

>Napa cabbage 29-1

AACATACCTATCGTTCCCTCGGCGGGCTCAGCGCGCGGTGCCTCCGGGCTCCGGGCGTCCGCCGGGGACAACC  
AAACTCTGATTTTATTGTGAATCTCTGAGGGGCGAAAGCCCCGACAACAAAATGAATCAAACTTTCAACAACG  
GATCTCTTGGCTCTGGCATCGATGAAGAACGCAGCGAAATGCGATAAGTAATGTGAATTGCAGAATTCAGTGA  
ATCATCGAATCTTTGAACGCACATTGCGCCCGCCGGCACTCCGGCGGGCATGCCTGTCCGAGCGTCATTTCAA  
CCCTCAGGACCCCCCTTTCGGGGGGGACCTGGTGCTGGGGATCAGCGGCCTCCGGGCCCCCTGTCCCCCAAATTG  
AGTGGCGGTTCGCGCCGCAGCCTCCCCTGCGTAGTAGCACACCTCGCACCCGAGAGCGGCTCGGCCACGCCGTG  
AAACCCCCAATTTTTTAAGGTTGACCTCGGATCAGGGAGGAATACCCGCTGA

>Napa cabbage 29-2

TTGTGAACATACCTATCGTTCCCTCGGCGGGCTCAGCGCGCGGTGCCTCCGGGCTCCGGGCGTCCGCCGGGGGA  
CAACCAAACCTCTGATTTTATTGTGAATCTCTGAGGGGCGAAAGCCCCGACAACAAAATGAATCAAACTTTCAA  
CAACGGATCTCTTGGCTCTGGCATCGATGAAGAACGCAGCGAAATGCGATAAGTAATGTGAATTGCAGAATTC  
AGTGAATCATCGAATCTTTGAACGCACATTGCGCCCGCCGGCACTCCGGCGGGCATGCCTGTCCGAGCGTCAT  
TTCAACCCTCAGGACCCCCCTTTCGGGGGGGACCTGGTGCTGGGGATCAGCGGCCTCCGGGCCCCCTGTCCCCCA  
AATTGAGTGGCGGTTCGCGCCGCAGCCTCCCCTGCGTAGTAGCACACCTCGCACCCGAGAGCGGCTCGGCCACG  
CCGTGAAACCCCCAATTTTTTAAGGTTGACCTCGGATCAGGTAGGAATACCCGCTGAACTTAAGCA

>Napa cabbage 29-3

TGTGAACATACCTATCGTTCCCTCGGCGGGCTCAGCGCGCGGTGCCTCCGGGCTCCGGGCGTCCGCCGGGGAC  
AACCAAACCTCTGATTTTATTGTGAATCTCTGAGGGGCGAAAGCCCCGACAACAAAATGAATCAAACTTTCAAC  
AACGGATCTCTTGGCTCTGGCATCGATGAAGAACGCAGCGAAATGCGATAAGTAATGTGAATTGCAGAATTC  
GTGAATCATCGAATCTTTGAACGCACATTGCGCCCGCCGGCACTCCGGCGGGCATGCCTGTCCGAGCGTCATT  
TCAACCCTCAGGACCCCCCTTTCGGGGGGGACCTGGTGCTGGGGATCAGCGGCCTCCGGGCCCCCTGTCCCCAA  
ATTGAGTGGCGGTTCGCGCCGCAGCCTCCCCTGCGTAGTAGCACACCTCGCACCCGAGAGCGGCTCGGCCACGC  
CGTGAAACCCCCAATTTTTTAAGGTTGACCTCGGATCAGGTAGGAATACCCGCTGAACTT

>Napa cabbage 29-4

TTGTGAACATACCTATCGTTCCCTCGGCGGGCTCAGCGCGCGGTGCCTCCGGGCTCCGGGCGTCCGCCGGGGGA  
CAACCAAACCTCTGATTTTATTGTGAATCTCTGAGGGGCGAAAGCCCCGACAACAAAATGAATCAAACTTTCAA  
CAACGGATCTCTTGGCTCTGGCATCGATGAAGAACGCAGCGAAATGCGATAAGTAATGTGAATTGCAGAATTC  
AGTGAATCATCGAATCTTTGAACGCACATTGCGCCCGCCGGCACTCCGGCGGGCATGCCTGTCCGAGCGTCAT  
TTCAACCCTCAGGACCCCCCTTTCGGGGGGGACCTGGTGCTGGGGATCAGCGGCCTCCGGGCCCCCTGTCCCCCA  
AATTGAGTGGCGGTTCGCGCCGCAGCCTCCCCTGCGTAGTAGCACACCTCGCACCCGAGAGCGGCTCGGCCACG  
CCGTGAAACCCCCAATTTTTTAAGGTTGACCTCGGATCAGGTAGGAATACCCGCTGAAC

>Napa cabbage 29-5

TTGTGAACATACCTATCGTTCCCTCGGCGGGCTCAGCGCGCGGTGCCTCCGGGCTCCGGGCGTCCGCCGGGGGA  
CAACCAAACCTCTGATTTTATTGTGAATCTCTGAGGGGCGAAAGCCCCGACAACAAAATGAATCAAACTTTCAA

CAACGGATCTCTTGGCTCTGGCATCGATGAAGAACGCAGCGAAATGCGATAAGTAATGTGAATTGCAGAATTC  
AGTGAATCATCGAATCTTTGAACGCACATTGCGCCCGCCGGCACTCCGGCGGGCATGCCTGTCCGAGCGTCAT  
TTCAACCCTCAGGACCCCCCTTTCGGGGGGGACCTGGTGCTGGGGATCAGCGGCCTCCGGGCCCCCTGTCCCCCA  
AATTGAGTGGCGGTTCGCGCCGCAGCCTCCCCTGCGTAGTAGCACACCTCGCACCGGAGAGCGGCTCGGCCACG  
CCGAGAAACCCCAAATTTTTTAACGTCGACCCCGGATCAGGCACGAAT

>Napa cabbage 12.2-1

TACCTATCGTTCCCTCGGCGGGCTCAGCGCGCGGTGCCTCCGGGCTCCGGGCGTCCGCCGGGGACAACCAAAC  
TCTGATTTTATTGTGAATCTCTGAGGGGCGAAAGCCCCGACAACAAAATGAATCAAACTTTCAACAACGGATC  
TCTTGGCTCTGGCATCGATGAAGAACGCAGCGAAATGCGATAAGTAATGTGAATTGCAGAATTCAGTGAATCA  
TCGAATCTTTGAACGCACATTGCGCCCGCCGGCACTCCGGCGGGCATGCCTGTCCGAGCGTCATTTCAACCCT  
CAGGACCCCCCTTTCGGGGGGGACCTGGTGCTGGGGATCAGCGGCCTCCGGGCCCCCTGTCCCCCAAATTGAGTG  
GCGGTGCGCGCCGCAGCCTCCCCTGCGTAGTAGCACACCTCGCACCGGAGAGCGGCTCGGCCACGCCGTGAAAC  
CCCCAATTTTTTAAGGTTGACCTCGGATCAGGTAGGAATACCCGC

>Radish-2 26-4

TGTGAACATACCTATCGTTCCCTCGGCGGGCTCAGCGCGCGGTGCCTCCGGGCTCCGGGCGTCCGCCGGGGAC  
AACCAAACCTCTGATTTTATTGTGAATCTCTGAGGGGCGAAAGCCCCGACAACAAAATGAATCAAACTTTCAAC  
AACGGATCTCTTGGCTCTGGCATCGATGAAGAACGCAGCGAAATGCGATAAGTAATGTGAATTGCAGAATTCA  
GTGAATCATCGAATCTTTGAACGCACATTGCGCCCGCCGGCACTCCGGCGGGCATGCCTGTCCGAGCGTCATT  
TCAACCCTCAGGACCCCCCTTTCGGGGGGGACCTGGTGCTGGGGATCAGCGGCCTCCGGGCCCCCTGTCCCCCAA  
ATTGAGTGGCGGTTCGCGCCGCAGCCTCCCCTGCGTAGTAGCACACCTCGCACCGGAGAGCGGCTCGGCCACGC  
CGTGAAACCCCAATTTTTTAAGGTTGACCTCGGATCAGGTAGGAATACCCGCTGAACTTAA

>Radish-2 27-3

TTGTGAACATACCTATCGTTCCCTCGGCGGGCTCAGCGCGCGGTGCCTCCGGGCTCCGGGCGTCCGCCGGGGGA  
CAACCAAACCTCTGATTTTATTGTGAATCTCTGAGGGGCGAAAGCCCCGACAACAAAATGAATCAAACTTTCAA  
CAACGGATCTCTTGGCTCTGGCATCGATGAAGAACGCAGCGAAATGCGATAAGTAATGTGAATTGCAGAATTC  
AGTGAATCATCGAATCTTTGAACGCACATTGCGCCCGCCGGCACTCCGGCGGGCATGCCTGTCCGAGCGTCAT  
TTCAACCCTCAGGACCCCCCTTTCGGGGGGGACCTGGTGCTGGGGATCAGCGGCCTCCGGGCCCCCTGTCCCCCA  
AATTGAGTGGCGGTTCGCGCCGCAGCCTCCCCTGCGTAGTAGCACACCTCGCACCGGAGAGCGGCTCGGCCACG  
CCGTGAAACCCCAATTTTTTAAGGTTGACCTCGGATCAGGTAGGAATACCCGCTGAACTTAAGCATATCAA

>Radish-2 27-4

TGTGACATACCTATCGTTCCCTCGGCGGGCTCAGCGCGCGGTGCCTCCGGGCTCCGGGCGTCCGCCGGGGACA  
ACCAAACCTCTGATTTTATTGTGAATCTCTGAGGGGCGAAAGCCCCGACAACAAAATGAATCAAACTTTCAACA  
ACGGATCTCTTGGCTCTGGCATCGATGAAGAACGCAGCGAAATGCGATAAGTAATGTGAATTGCAGAATTCAG  
TGAATCATCGAATCTTTGAACGCACATTGCGCCCGCCGGCACTCCGGCGGGCATGCCTGTCCGAGCGTCATTT  
CAACCCTCAGGACCCCCCTTTCGGGGGGGACCTGGTGCTGGGGATCAGCGGCCTCCGGGCCCCCTGTCCCCCAA  
TTGAGTGGCGGTTCGCGCCGCAGCCTCCCCTGCGTAGTAGCACACCTCGCACCGGAGAGCGGCTCGGCCACGCC  
GTGAAACCCCAATTTTTTAAGGTTGACCTCGGATCAGGTAGGAATACCCGCTGAACTTAAGC

>Radish-2 27-7

TTGTGACATACCTATCGTTCCCTCGGCGGGCTCAGCGCGCGGTGCCTCCGGGCTCCGGGCGTCCGCCGGGGAC  
AACCAAACCTCTGATTTTATTGTGAATCTCTGAGGGGCGAAAGCCCCGACAACAAAATGAATCAAACTTTCAAC  
AACGGATCTCTTGGCTCTGGCATCGATGAAGAACGCAGCGAAATGCGATAAGTAATGTGAATTGCAGAATTCA  
GTGAATCATCGAATCTTTGAACGCACATTGCGCCCGCCGGCACTCCGGCGGGCATGCCTGTCCGAGCGTCATT  
TCAACCCTCAGGACCCCCCTTTCGGGGGGGACCTGGTGCTGGGGATCAGCGGCCTCCGGGCCCCCTGTCCCCCAA  
ATTGAGTGGCGGTTCGCGCCGCAGCCTCCCCTGCGTAGTAGCACACCTCGCACCGGAGAGCGGCTCGGCCACGC  
CGTGAAACCCCAATTTTTTAAGGTTGACCTCGGATCAGGTAGGAATACCCGCTGAACTTAAGCATATCAA

>Radish-2 27-8

TGTGAACATACCTATCGTTCCCTCGGCGGGCTCAGCGCGCGGTGCCTCCGGGCTCCGGGCGTCCGCCGGGGAC  
AACCAAACCTCTGATTTTATTGTGAATCTCTGAGGGGCGAAAGCCCCGACAACAAAATGAATCAAACTTTCAAC  
AACGGATCTCTTGGCTCTGGCATCGATGAAGAACGCAGCGAAATGCGATAAGTAATGTGAATTGCAGAATTCA  
GTGAATCATCGAATCTTTGAACGCACATTGCGCCCGCCGGCACTCCGGCGGGCATGCCTGTCCGAGCGTCATT  
TCAACCCTCAGGACCCCCCTTTCGGGGGGGACCTGGTGCTGGGGATCAGCGGCCTCCGGGCCCCCTGTCCCCCAA  
ATTGAGTGGCGGTTCGCGCCGCAGCCTCCCCTGCGTAGTAGCACACCTCGCACCGGAGAGCGGCTCGGCCACGC  
CGTGAAACCCCAATTTTTTAAGGTTGACCTCGGATCAGGTAGGAATACCCGCTGAACTTAAGCATATCAA

>Radish-2 29-4

TTGTGAACATACCTATCGTTCCCTCGGCGGGCTCAGCGCGCGGTGCCTCCGGGCTCCGGGCGTCCGCCGGGGGA  
CAACCAAACCTCTGATTTTATTGTGAATCTCTGAGGGGCGAAAGCCCCGACAACAAAATGAATCAAACTTTCAA  
CAACGGATCTCTTGGCTCTGGCATCGATGAAGAACGCAGCGAAATGCGATAAGTAATGTGAATTGCAGAATTC  
AGTGAATCATCGAATCTTTGAACGCACATTGCGCCCGCCGGCACTCCGGCGGGCATGCCTGTCCGAGCGTCAT

TTCAACCCTCAGGACCCCCCTTTCGGGGGGGACCTGGTGCTGGGGATCAGCGGCCTCCGGGCCCCCTGTCCCCCA  
AATTGAGTGGCGGTTCGCGCCGAGCCTCCCCTGCGTAGTAGCACACCTCGCACCGGAGAGCGGCTCGGCCACG  
CCGTGAAACCCCCAATTTTTTAAGGTTGACCTCGGATCAGGTAGGAATACCCGCTGAACTTAAGCATATCAA  
>Radish-2 29-5

TTGTGACATACCTATCGTTCCCTCGGCGGGCTCAGCGCGCGGTGCCTCCGGGCTCCGGGCGTCCGCCGGGGAC  
AACCAAACCTCTGATTTTATTGTGAATCTCTGAGGGGCGAAAGCCCGACAACAAAATGAATCAAAACTTTCAAC  
AACGGATCTCTTGGCTCTGGCATCGATGAAGAACGCAGCGAAATGCGATAAGTAATGTGAATTGCAGAATTCA  
GTGAATCATCGAATCTTTGAACGCACATTGCGCCCCGCCGGCACTCCGGCGGGCATGCCTGTCCGAGCGTCATT  
TCAACCCTCAGGACCCCCCTTTCGGGGGGGACCTGGTGCTGGGGATCAGCGGCCTCCGGGCCCCCTGTCCCCCA  
ATTGAGTGGCGGTTCGCGCCGAGCCTCCCCTGCGTAGTAGCACACCTCGCACCGGAGAGCGGCTCGGCCACGC  
CGTGAACCCCCAATTTTTTAAGGTTGACCTCGGATCAGGTAGGAATACCCGCTGAACTTAAGCATATCAA  
>Radish-2 29-7

TGTGAACATACCTATCGTTCCCTCGGCGGGCTCAGCGCGCGGTGCCTCCGGGCTCCGGGCGTCCGCCGGGGAC  
AACCAAACCTCTGATTTTATTGTGAATCTCTGAGGGGCGAAAGCCCGACAACAAAATGAATCAAAACTTTCAAC  
AACGGATCTCTTGGCTCTGGCATCGATGAAGAACGCAGCGAAATGCGATAAGTAATGTGAATTGCAGAATTCA  
GTGAATCATCGAATCTTTGAACGCACATTGCGCCCCGCCGGCACTCCGGCGGGCATGCCTGTCCGAGCGTCATT  
TCAACCCTCAGGACCCCCCTTTCGGGGGGGACCTGGTGCTGGGGATCAGCGGCCTCCGGGCCCCCTGTCCCCCA  
ATTGAGTGGCGGTTCGCGCCGAGCCTCCCCTGCGTAGTAGCACACCTCGCACCGGAGAGCGGCTCGGCCACGC  
CGTGAACCCCCAATTTTTTAAGGTTGACCTCGGATCAGGTAGGAATACCCGCTGAACTTAAGCA  
>Spinach 24-4

TTGTGAACATACCTATCGTTCCCTCGGCGGGCTCAGCGCGCGGTGCCTCCGGGCTCCGGGCGTCCGCCGGGGGA  
CAACCAAACCTCTGATTTTATTGTGAATCTCTGAGGGGCGAAAGCCCGACAACAAAATGAATCAAAACTTTCAA  
CAACGGATCTCTTGGCTCTGGCATCGATGAAGAACGCAGCGAAATGCGATAAGTAATGTGAATTGCAGAATTC  
AGTGAATCATCGAATCTTTGAACGCACATTGCGCCCCGCCGGCACTCCGGCGGGCATGCCTGTCCGAGCGTCAT  
TTCAACCCTCAGGACCCCCCTTTCGGGGGGGACCTGGTGCTGGGGATCAGCGGCCTCCGGGCCCCCTGTCCCCCA  
AATTGAGTGGCGGTTCGCGCCGAGCCTCCCCTGCGTAGTAGCACACCTCGCACCGGAGAGCGGCTCGGCCACG  
CCGTGAAACCCCCAATTTTTTAAGGTTGACCTCGGATCAGGTAGGAATACCCGCTGAACTTAAGCA  
>Spinach 24-6

TTGTGAACATACCTATCGTTCCCTCGGCGGGCTCAGCGCGCGGTGCCTCCGGGCTCCGGGCGTCCGCCGGGGGA  
CAACCAAACCTCTGATTTTATTGTGAATCTCTGAGGGGCGAAAGCCCGACAACAAAATGAATCAAAACTTTCAA  
CAACGGATCTCTTGGCTCTGGCATCGATGAAGAACGCAGCGAAATGCGATAAGTAATGTGAATTGCAGAATTC  
AGTGAATCATCGAATCTTTGAACGCACATTGCGCCCCGCCGGCACTCCGGCGGGCATGCCTGTCCGAGCGTCAT  
TTCAACCCTCAGGACCCCCCTTTCGGGGGGGACCTGGTGCTGGGGATCAGCGGCCTCCGGGCCCCCTGTCCCCCA  
AATTGAGTGGCGGTTCGCGCCGAGCCTCCCCTGCGTAGTAGCACACCTCGCACCGGAGAGCGGCTCGGCCACG  
CCGTGAAACCCCCAATTTTTTAAGGTTGACCTCGGATCAGGTAGGAATACCCGCTGAACTTAAGCA  
>Spinach 26-6

TTGTGAACATACCTATCGTTCCCTCGGCGGGCTCAGCGCGCGGTGCCTCCGGGCTCCGGGCGTCCGCCGGGGGA  
CAACCAAACCTCTGATTTTATTGTGAATCTCTGAGGGGCGAAAGCCCGACAACAAAATGAATCAAAACTTTCAA  
CAACGGATCTCTTGGCTCTGGCATCGATGAAGAACGCAGCGAAATGCGATAAGTAATGTGAATTGCAGAATTC  
AGTGAATCATCGAATCTTTGAACGCACATTGCGCCCCGCCGGCACTCCGGCGGGCATGCCTGTCCGAGCGTCAT  
TTCAACCCTCAGGACCCCCCTTTCGGGGGGGACCTGGTGCTGGGGATCAGCGGCCTCCGGGCCCCCTGTCCCCCA  
AATTGAGTGGCGGTTCGCGCCGAGCCTCCCCTGCGTAGTAGCACACCTCGCACCGGAGAGCGGCTCGGCCACG  
CCGTGAAACCCCCAATTTTTTAAGGTTGACCTCGGATCAGGTAGGAATACCCGCTGAACTTAAGCA  
>Spinach 26-7

TTGTGAACATACCTATCGTTCCCTCGGCGGGCTCAGCGCGCGGTGCCTCCGGGCTCCGGGCGTCCGCCGGGGGA  
CAACCAAACCTCTGATTTTATTGTGAATCTCTGAGGGGCGAAAGCCCGACAACAAAATGAATCAAAACTTTCAA  
CAACGGATCTCTTGGCTCTGGCATCGATGAAGAACGCAGCGAAATGCGATAAGTAATGTGAATTGCAGAATTC  
AGTGAATCATCGAATCTTTGAACGCACATTGCGCCCCGCCGGCACTCCGGCGGGCATGCCTGTCCGAGCGTCAT  
TTCAACCCTCAGGACCCCCCTTTCGGGGGGGACCTGGTGCTGGGGATCAGCGGCCTCCGGGCCCCCTGTCCCCCA  
AATTGAGTGGCGGTTCGCGCCGAGCCTCCCCTGCGTAGTAGCACACCTCGCACCGGAGAGCGGCTCGGCCACG  
CCGTGAAACCCCCAATTTTTTAAGGTTGACCTCGGATCAGGTAGGAACACCCGCTGAA  
>Spinach 26-8

TTGTGAACATACCTATCGTTCCCTCGGCGGGCTCAGCGCGCGGTGCCTCCGGGCTCCGGGCGTCCGCCGGGGGA  
CAACCAAACCTCTGATTTTATTGTGAATCTCTGAGGGGCGAAAGCCCGACAACAAAATGAATCAAAACTTTCAA  
CAACGGATCTCTTGGCTCTGGCATCGATGAAGAACGCAGCGAAATGCGATAAGTAATGTGAATTGCAGAATTC  
AGTGAATCATCGAATCTTTGAACGCACATTGCGCCCCGCCGGCACTCCGGCGGGCATGCCTGTCCGAGCGTCAT  
TTCAACCCTCAGGACCCCCCTTTCGGGGGGGACCTGGTGCTGGGGATCAGCGGCCTCCGGGCCCCCTGTCCCCCA  
AATTGAGTGGCGGTTCGCGCCGAGCCTCCCCTGCGTAGTAGCACACCTCGCACCGGAGAGCGGCTCGGCCACG  
CCGTGAAACCCCCAATTTTTTAAGGTTGACCTCGGATCAGGTAGGAACACCCGCTGAA

AATTGAGTGGCGGTTCGCGCCGCAGCCTCCCCTGCGTAGTAGCACACCTCGCACCCGGAGAGCGGCTCGGCCACG  
CCGTGAAACCCCAATTTTTTAAGGTTGACCTCGGATCAGGT

>Spinach 27-1

AACATACCTATCGTTCCCTCGGCGGGCTCAGCGCGCGGTGCCTCCGGGCTCCGGGCGTCCGCCGGGGACAACC  
AAACTCTGATTTTATTGTGAATCTCTGAGGGGCGAAAGCCCCGACAACAAAATGAATCAAACTTTCAACAACG  
GATCTCTTGGCTCTGGCATCGATGAAGAACGCAGCGAAATGCGATAAGTAATGTGAATTGCAGAATTCAGTGA  
ATCATCGAATCTTTGAACGCACATTGCGCCCCGCCGGCACTCCGGCGGGCATGCCTGTCCGAGCGTCATTTCAA  
CCCTCAGGACCCCTTTTCGGGGGGGACCTGGTGCTGGGGATCAGCGGCCTCCGGGCCCCTGTCCCCCAAATTG  
AGTGGCGGTTCGCGCCGCAGCCTCCCCTGCGTAGTAGCACACCTCGCACCCGGAGAGCGGCTCGGCCACGCCGTG  
AAACCCCAATTTTTTAAGGTTGACCTCGGATCAGGTAGGAATACCCGCTGAACCTTAAGCA

>Spinach 29-2

TTGTGAACATACCTATCGTTCCCTCGGCGGGCTCAGCGCGCGGTGCCTCCGGGCTCCGGGCGTCCGCCGGGGGA  
CAACCAAACCTCTGATTTTATTGTGAATCTCTGAGGGGCGAAAGCCCCGACAACAAAATGAATCAAACTTTCAA  
CAACGGATCTCTTGGCTCTGGCATCGATGAAGAACGCAGCGAAATGCGATAAGTAATGTGAATTGCAGAATTC  
AGTGAATCATCGAATCTTTGAACGCACATTGCGCCCCGCCGGCACTCCGGCGGGCATGCCTGTCCGAGCGTCAT  
TTCAACCCTCAGGACCCCTTTTCGGGGGGGACCTGGTGCTGGGGATCAGCGGCCTCCGGGCCCCTGTCCCCCA  
AATTGAGTGGCGGTTCGCGCCGCAGCCTCCCCTGCGTAGTAGCACACCTCGCACCCGGAGAGCGGCTCGGCCACG  
CCGTGAAACCCCAATTTTTTAAGGTTGACCTCGGATCAGGTAGGAATACCCGCTGAACCTTA

>Spinach 29-3

AACATACCTATCGTTCCCTCGGCGGGCTCAGCGCGCGGTGCCTCCGGGCTCCGGGCGTCCGCCGGGGACAACC  
AAACTCTGATTTTATTGTGAATCTCTGAGGGGCGAAAGCCCCGACAACAAAATGAATCAAACTTTCAAACAACG  
GATCTCTTGGCTCTGGCATCGATGAAGAACGCAGCGAAATGCGATAAGTAATGTGAATTGCAGAATTCAGTGA  
ATCATCGAATCTTTGAACGCACATTGCGCCCCGCCGGCACTCCGGCGGGCATGCCTGTCCGAGCGTCATTTCAA  
CCCTCAGGACCCCTTTTCGGGGGGGACCTGGTGCTGGGGATCAGCGGCCTCCGGGCCCCTGTCCCCCAAATTG  
AGTGGAGGTTCGCGCCGCAGCCTCCCCTGCATGTATCACACCTCGTTCCGGATAGCGGCTCGGTACCTCGATA  
AACCCCCATTTTTTGATTTAGACCTCATGATTAAGCTCGAAAACCCCATTTATTGCAAC

>Stem lettuce 24-4

TTGTGAACATACCTATCGTTCCCTCGGCGGGCTCAGCGCGCGGTGCCTCCGGGCTCCGGGCGTCCGCCGGGGGA  
CAACCAAACCTCTGATTTTATTGTGAATCTCTGAGGGGCGAAAGCCCCGACAACAAAATGAATCAAACTTTCAA  
CAACGGATCTCTTGGCTCTGGCATCGATGAAGAACGCAGCGAAATGCGATAAGTAATGTGAATTGCAGAATTC  
AGTGAATCATCGAATCTTTGAACGCACATTGCGCCCCGCCGGCACTCCGGCGGGCATGCCTGTCCGAGCGTCAT  
TTCAACCCTCAGGACCCCTTTTCGGGGGGGACCTGGTGCTGGGGATCAGCGGCCTCCGGGCCCCTGTCCCCCA  
AATTGAGTGGCGGTTCGCGCCGCAGCCTCCCCTGCGTAGTAGCACACCTCGCACCCGGAGAGCGGCTCGGCCACG  
CCGTGAAACCCCAATTTTTTAAGGTTGACCTCGGATCAGGTAGGAATACCCGCTGAACCTTAAGCATAT

>Stem lettuce 12.2-2

TTGTGAACATACCTATCGTTCCCTCGGCGGGCTCAGCGCGCGGTGCCTCCGGGCTCCGGGCGTCCGCCGGGGGA  
CAACCAAACCTCTGATTTTATTGTGAATCTCTGAGGGGCGAAAGCCCCGACAACAAAATGAATCAAACTTTCAA  
CAACGGATCTCTTGGCTCTGGCATCGATGAAGAACGCAGCGAAATGCGATAAGTAATGTGAATTGCAGAATTC  
AGTGAATCATCGAATCTTTGAACGCACATTGCGCCCCGCCGGCACTCCGGCGGGCATGCCTGTCCGAGCGTCAT  
TTCAACCCTCAGGACCCCTTTTCGGGGGGGACCTGGTGCTGGGGATCAGCGGCCTCCGGGCCCCTGTCCCCCA  
AATTGAGTGGCGGTTCGCGCCGCAGCCTCCCCTGCGTAGTAGCACACCTCGCACCCGGAGAGCGGCTCGGCCACG  
CCGTGAAACCCCAATTTTTTAAGGTTGACCTCGGATCAGGTAGGAATACCCGCTGAACCTTAAGCATAT

### TEF1a sequences

>Bok choy 24-2

CGCTGCCGGTACTGGTGAGTTCGAGGCTGGTATCTCCAAGGATGGCCAGACTCGTGAGCACGCCCTGCTCGCC  
TACACCCCTCGGTGTGCGTCAGCTCATCGTCGCCATCAACAAGATGGACACCACCAAGTGGTCTGAGGCCCGTT  
ACCAGGAGATTATCAAGGAGACCTCCAACCTTCATCAAGAAGTTCGGCTACAACCCCAAGACCGTCGCCTTCGT  
CCCCATCTCCGGTTTCCACGGTGACAACATGCTTGCCCCCACCACCAACGCCCCCTGGTACAAGGGTTGGGAG  
CGTGAGATCAAGGGCAACAAGCAGACCGGCAAGACCCTCCTCGAGGCCATTGACGGTGTTGAGCCCCCAAGC  
GTCCCTCCGACAAGCCCCCTCCGTCTTCCCCTTCAGGATGTCTACAAGATTGGTGGTATTGGCACGGTCCCTGT  
CGGCCGTATCGAGACCGGTGTCTCAAGCCCCTGATGGTCGTACCTTCGCCCCCTGCCAACGTACCACTGAA  
GTCAAGTCCGTGAGATGCACCACGAGCAGCTCTCTGAGGGTCTTCCCGGTGACAATGT

>Bok choy 24-4

CGCTGCCGGTACTGGTGAGTTCGAGGCTGGTATCTCCAAGGATGGCCAGACTCGTGAGCACGCCCTGCTCGCC  
TACACCCCTCGGTGTGCGTCAGCTCATCGTCGCCATCAACAAGATGGACACCACCAAGTGGTCTGAGGCCCGTT  
ACCAGGAGATTATCAAGGAGACCTCCAACCTTCATCAAGAAGTTCGGCTACAACCCCAAGACCGTCGCCTTCGT  
CCCCATCTCCGGTTTCCACGGTGACAACATGCTTGCCCCCACCACCAACGCCCCCTGGTACAAGGGTTGGGAG

CGTGAGATCAAGGGCAACAAGCAGACCGGCAAGACCCCTCCTCGAGGCCATTGACGGTGTTGAGCCCCCAAGC  
GTCCCTCCGACAAGCCCCCTCCGTCTTCCCCTTCAGGATGTCTACAAGATTGGTGGTATTGGCACGGTCCCTGT  
CGGCCGTATCGAGACCGGTGTCTCAAGCCCGGTATGGTCGTACCTTCGCCCCTGCCAACGTCACCACTGAA  
GTCAAGTCCGTGAGATGCACCACGAGCAGCTCTCTGAGGGTCTTCCCAGTGACAA

>Radish-2 27-3

CGCTGCCGGTACTGGTGAGTTCGAGGCTGGTATCTCCAAGGATGGCCAGACTCGTGAGCACGCCCTGCTCGCC  
TACACCCTCGGTGTGCGTCAGCTCATCGTCGCCATCAACAAGATGGACACCACCAAGTGGTCTGAGGCCCCGT  
ACCAGGAGATTATCAAGGAGACCTCCAACCTTCATCAAGAAGGTTCGGCTACAACCCCCAAGACCGTCGCCTTCGT  
CCCCATCTCCGGTTTCCACGGTGACAACATGCTTGCCCCCACCACCAACGCCCCCTGGTACAAGGGTTGGGAG  
CGTGAGATCAAGGGCAACAAGCAGACCGGCAAGACCCCTCCTCGAGGCCATTGACGGTGTTGAGCCCCCAAGC  
GTCCCTCCGACAAGCCCCCTCCGTCTTCCCCTTCAGGATGTCTACAAGATTGGTGGTATTGGCACGGTCCCTGT  
CGGCCGTATCGAGACCGGTGTCTCAAGCCCGGTATGGTCGTACCTTCGCCCCTGCCAACGTCACCACTGAA  
GTCAAGTCCGTGAGATGCACCACGAGCAGCTCTCTGAGGGTCTTCCCAGTGACAATGT

>Radish-2 27-4

CGCTGCCGGTACTGGTGAGTTCGAGGCTGGTATCTCCAAGGATGGCCAGACTCGTGAGCACGCCCTGCTCGCC  
TACACCCTCGGTGTGCGTCAGCTCATCGTCGCCATCAACAAGATGGACACCACCAAGTGGTCTGAGGCCCCGT  
ACCAGGAGATTATCAAGGAGACCTCCAACCTTCATCAAGAAGGTTCGGCTACAACCCCCAAGACCGTCGCCTTCGT  
CCCCATCTCCGGTTTCCACGGTGACAACATGCTTGCCCCCACCACCAACGCCCCCTGGTACAAGGGTTGGGAG  
CGTGAGATCAAGGGCAACAAGCAGACCGGCAAGACCCCTCCTCGAGGCCATTGACGGTGTTGAGCCCCCAAGC  
GTCCCTCCGACAAGCCCCCTCCGTCTTCCCCTTCAGGATGTCTACAAGATTGGTGGTATTGGCACGGTCCCTGT  
CGGCCGTATCGAGACCGGTGTCTCAAGCCCGGTATGGTCGTACCTTCGCCCCTGCCAACGTCACCACTGAA  
GTCAAGTCCGTGAGATGCACCACGAGCAGCTCTCTGAGGGTCTTCCCAGTGACAATGT

>Radish-2 27-7

CGCTGCCGGTACTGGTGAGTTCGAGGCTGGTATCTCCAAGGATGGCCAGACTCGTGAGCACGCCCTGCTCGCC  
TACACCCTCGGTGTGCGTCAGCTCATCGTCGCCATCAACAAGATGGACACCACCAAGTGGTCTGAGGCCCCGT  
ACCAGGAGATTATCAAGGAGACCTCCAACCTTCATCAAGAAGGTTCGGCTACAACCCCCAAGACCGTCGCCTTCGT  
CCCCATCTCCGGTTTCCACGGTGACAACATGCTTGCCCCCACCACCAACGCCCCCTGGTACAAGGGTTGGGAG  
CGTGAGATCAAGGGCAACAAGCAGACCGGCAAGACCCCTCCTCGAGGCCATTGACGGTGTTGAGCCCCCAAGC  
GTCCCTCCGACAAGCCCCCTCCGTCTTCCCCTTCAGGATGTCTACAAGATTGGTGGTATTGGCACGGTCCCTGT  
CGGCCGTATCGAGACCGGTGTCTCAAGCCCGGTATGGTCGTACCTTCGCCCCTGCCAACGTCACCACTGAA  
GTCAAGTCCGTGAGATGCACCACGAGCAGCTCTCTGAGGGTCTTCCCAGTGACAATGT

>Radish-2 27-8

CGCTGCCGGTACTGGTGAGTTCGAGGCTGGTATCTCCAAGGATGGCCAGACTCGTGAGCACGCCCTGCTCGCC  
TACACCCTCGGTGTGCGTCAGCTCATCGTCGCCATCAACAAGATGGACACCACCAAGTGGTCTGAGGCCCCGT  
ACCAGGAGATTATCAAGGAGACCTCCAACCTTCATCAAGAAGGTTCGGCTACAACCCCCAAGACCGTCGCCTTCGT  
CCCCATCTCCGGTTTCCACGGTGACAACATGCTTGCCCCCACCACCAACGCCCCCTGGTACAAGGGTTGGGAG  
CGTGAGATCAAGGGCAACAAGCAGACCGGCAAGACCCCTCCTCGAGGCCATTGACGGTGTTGAGCCCCCAAGC  
GTCCCTCCGACAAGCCCCCTCCGTCTTCCCCTTCAGGATGTCTACAAGATTGGTGGTATTGGCACGGTCCCTGT  
CGGCCGTATCGAGACCGGTGTCTCAAGCCCGGTATGGTCGTACCTTCGCCCCTGCCAACGTCACCACTGAA  
GTCAAGTCCGTGAGATGCACCACGAGCAGCTCTCTGAGGGTCTTCCCAGTGACAC

>Radish-2 29-4

TATCGCTGCCGGTACTGGTGAGTTCGAGGCTGGTATCTCCAAGGATGGCCAGACTCGTGAGCACGCCCTGCTC  
GCCTACACCCTCGGTGTGCGTCAGCTCATCGTCGCCATCAACAAGATGGACACCACCAAGTGGTCTGAGGCCC  
GTTACCAGGAGATTATCAAGGAGACCTCCAACCTTCATCAAGAAGGTTCGGCTACAACCCCCAAGACCGTCGCCTTCGT  
CGTCCCCATCTCCGGTTTCCACGGTGACAACATGCTTGCCCCCACCACCAACGCCCCCTGGTACAAGGGTTGG  
GAGCGTGAGATCAAGGGCAACAAGCAGACCGGCAAGACCCCTCCTCGAGGCCATTGACGGTGTTGAGCCCCCA  
AGCGTCCCTCCGACAAGCCCCCTCCGTCTTCCCCTTCAGGATGTCTACAAGATTGGTGGTATTGGCACGGTCCC  
TGTCGGCCGTATCGAGACCGGTGTCTCAAGCCCGGTATGGTCGTACCTTCGCCCCTGCCAACGTCACCACT  
GAAGTCAAGTCCGTGAGATGCACCACGAGCAGCTCTCTGAGGGTCTTCCCAGGAC

>Radish-2 29-5

CGCTGCCGGTACTGGTGAGTTCGAGGCTGGTATCTCCAAGGATGGCCAGACTCGTGAGCACGCCCTGCTCGCC  
TACACCCTCGGTGTGCGTCAGCTCATCGTCGCCATCAACAAGATGGACACCACCAAGTGGTCTGAGGCCCCGT  
ACCAGGAGATTATCAAGGAGACCTCCAACCTTCATCAAGAAGGTTCGGCTACAACCCCCAAGACCGTCGCCTTCGT  
CCCCATCTCCGGTTTCCACGGTGACAACATGCTTGCCCCCACCACCAACGCCCCCTGGTACAAGGGTTGGGAG  
CGTGAGATCAAGGGCAACAAGCAGACCGGCAAGACCCCTCCTCGAGGCCATTGACGGTGTTGAGCCCCCAAGC  
GTCCCTCCGACAAGCCCCCTCCGTCTTCCCCTTCAGGATGTCTACAAGATTGGTGGTATTGGCACGGTCCCTGT  
CGGCCGTATCGAGACCGGTGTCTCAAGCCCGGTATGGTCGTACCTTCGCCCCTGCCAACGTCACCACTGAA  
GTCAAGTCCGTGAGATGCACCACGAGCAGCTCTCTGAGGGTCTTCCCAGTGACAATGT



>Spinach 27-1

ATCGTGCCGGTACTGGTGAGTTTCGAGGCTGGTATCTCCAAGGATGGCCAGACTCGTGAGCACGCCCTGCTCG  
CCTACACCCTCGGTGTGCGTCAGCTCATCGTCGCCATCAACAAGATGGACACCACCAAGTGGTCTGAGGCCCG  
TTACCAGGAGATTATCAAGGAGACCTCCAACCTTCATCAAGAAGGTCGGCTACAACCCCAAGACCGTCGCCTTC  
GTCCCCATCTCCGGTTTCCACGGTGACAACATGCTTGCCCCCACCACCAACGCCCCCTGGGACAAGGGTTGGG  
AGCGTGAGATCAAGGGCAACAAGCAGACCGGGAAGACCTCCTCGAGGTCATTGACGGTGTTGAGCCCCCAA  
GCGTCCCTCCGACAAGCCCCCTCCGTCTTCCCCTTCAGGATGTCTACAAGATTGGTGGTATTGGCACGGTCCCT  
GCGGGCCCGTATCGAGACCGGTGTCCTCAAGCCCGGTATGGTCGTCACCTTCGCCCCCTGCCAACGTCACCACT  
GAAGTCAAGTCCGTCGAGATGCACCACGAGCAGCTCTCTGAGGGTCTTCCCAGGTGAC

>Stem lettuce 24-20

CGCTGCCGGTACTGGTGAGTTTCGAGGCTGGTATCTCCAAGGATGGCCAGACTCGTGAGCACGCCCTGCTCGCC  
TACACCCTCGGTGTGCGTCAGCTCATCGTCGCCATCAACAAGATGGACACCACCAAGTGGTCTGAGGCCCGTT  
ACCAGGAGATTATCAAGGAGACCTCCAACCTTCATCAAGAAGGTCGGCTACAACCCCAAGACCGTCGCCTTCGT  
CCCCATCTCCGGTTTCCACGGTGACAACATGCTTGCCCCCACCACCAACGCCCCCTGGTACAAGGGTTGGGAG  
CGTGAGATCAAGGGCAACAAGCAGACCGGCAAGACCTCCTCGAGGCCATTGACGGTGTTGAGCCCCCAAAGC  
GTCCCTCCGACAAGCCCCCTCCGTCTTCCCCTTCAGGATGTCTACAAGATTGGTGGTATTGGCACGGTCCCTGT  
CGGCCGTATCGAGACCGGTGTCCTCAAGCCCGGTATGGTCGTCACCTTCGCCCCCTGCCAACGTCACCACTGAA  
GTCAAGTCCGTCGAGATGCACCACGAGCAGCTCTCTGAGGGTCTTCCCAGGTGACAATGTCGGATTCAACGTC

>Stem lettuce 24-26

CGCTGCCGGTACTGGTGAGTTTCGAGGCTGGTATCTCCAAGGATGGCCAGACTCGTGAGCACGCCCTGCTCGCC  
TACACCCTCGGTGTGCGTCAGCTCATCGTCGCCATCAACAAGATGGACACCACCAAGTGGTCTGAGGCCCGTT  
ACCAGGAGATTATCAAGGAGACCTCCAACCTTCATCAAGAAGGTCGGCTACAACCCCAAGACCGTCGCCTTCGT  
CCCCATCTCCGGTTTCCACGGTGACAACATGCTTGCCCCCACCACCAACGCCCCCTGGTACAAGGGTTGGGAG  
CGTGAGATCAAGGGCAACAAGCAGACCGGCAAGACCTCCTCGAGGCCATTGACGGTGTTGAGCCCCCAAAGC  
GTCCCTCCGACAAGCCCCCTCCGTCTTCCCCTTCAGGATGTCTACAAGATTGGTGGTATTGGCACGGTCCCTGT  
CGGCCGTATCGAGACCGGTGTCCTCAAGCCCGGTATGGTCGTCACCTTCGCCCCCTGCCAACGTCACCACTGAA  
GTCAAGTCCGTCGAGATGCACCACGAGCAGCTCTCTGAGGGTCTTCCCAGGTGACAACG

>Stem lettuce 12.2-2

CGCTGCCGGTACTGGTGAGTTTCGAGGCTGGTATCTCCAAGGATGGCCAGACTCGTGAGCACGCCCTGCTCGCC  
TACACCCTCGGTGTGCGTCAGCTCATCGTCGCCATCAACAAGATGGACACCACCAAGTGGTCTGAGGCCCGTT  
ACCAGGAGATTATCAAGGAGACCTCCAACCTTCATCAAGAAGGTCGGCTACAACCCCAAGACCGTCGCCTTCGT  
CCCCATCTCCGGTTTCCACGGTGACAACATGCTTGCCCCCACCACCAACGCCCCCTGGTACAAGGGTTGGGAG  
CGTGAGATCAAGGGCAACAAGCAGACCGGCAAGACCTCCTCGAGGCCATTGACGGTGTTGAGCCCCCAAAGC  
GTCCCTCCGACAAGCCCCCTCCGTCTTCCCCTTCAGGATGTCTACAAGATTGGTGGTATTGGCACGGTCCCTGT  
CGGCCGTATCGAGACCGGTGTCCTCAAGCCCGGTATGGTCGTCACCTTCGCCCCCTGCCAACGTCACCACTGAA  
GTCAAGTCCGTCGAGATGCACCACGAGCAGCTCTCTGAGGGTCTTCCCAGGTGACAATGT

## ***Lecanicillium* sp.**

### **ITS sequences**

>Radish-2 27-16

TACCTTACAGTTGCTTCGGCGGAGCCGCCCCGGCGCCCGGAACCCAGTTTCGCGGCCCGGACCAAGGCGCCCG  
CCGGAGGCCACAACTCTTCTGTTTTTACAGTATCTTCTGAGTGTGCCGCAAGGCAAAAACAAATGAATCAAA  
ACTTTCAACAACGGATCTCTTGGTTCCTGGCATCGATGAAGAACGCAGCGAAATGCGATAAGTAATGTGAATTG  
CAGAATTCAGTGAATCATCGAATCTTTGAACGCACATTGCGCCCGCCAGAATTCTGGCGGGCATGCCTGTTTCG  
AGCGTCATTTCAACCCTCGGTCTCCCTCCGGGAGAGACCGGCGTTGGGGACCGGCATTACCCCGCCGGCCCC  
GAAATGAAGTGGCGGCCCGTCCGCGGCGACCTCTGCGTAGTAACCTCCACTCGCACCGGGACCCGGGCGCGGCC  
ACGCCGTAAAACCCCAACTTCCGAATGTTGACCTCGAATCAGGTAGGAATACCCGCTGAACTTAAGCATATC

>Celery 27-2

TACCTTACAGTTGCTTCGGCGGAGCCGCCCCGGCGCCCGGAACCCAGTTTCGCGGCCCGGACCAAGGCGCCCG  
CCGGAGGCCACAACTCTTCTGTTTTTACAGTATCTTCTGAGTGTGCCGCAAGGCAAAAACAAATGAATCAAA  
ACTTTCAACAACGGATCTCTTGGTTCCTGGCATCGATGAAGAACGCAGCGAAATGCGATAAGTAATGTGAATTG  
CAGAATTCAGTGAATCATCGAATCTTTGAACGCACATTGCGCCCGCCAGAATTCTGGCGGGCATGCCTGTTTCG  
AGCGTCATTTCAACCCTCGGTCTCCCTCCGGGAGAGACCGGCGTTGGGGACCGGCATTACCCCGCCGGCCCC  
GAAATGAAGTGGCGGCCCGTCCGCGGCGACCTCTGCGTAGTAACCTCCACTCGCACCGGGACCCGGGCGCGGCC  
ACGCCGTAAAACCCCAACTTCCGAATGTTGACCTCGAATCAGGTAGGAATACCCGCTGAACTTAAGCATAT

### TEF1a sequences

>Radish-2 27-16

CATCGCTGCCGGTACTGGTGAGTTCGAGGCTGGTATCTCCAAGGATGGCCAGACCCGTGAGCACGCTCTCCTC  
GCCTACACCCTGGGTGTCAAGCAGATCATTGTGCGCATCAACAAGATGGACACCACCAAGTGGTCTGAGGAGC  
GTTACCAGGAAATCATCAAGGAGACCTCCAACCTTCATCAAGAAGGTCGGCTACAACCCCAAGAACGTTGCCTT  
CGTCCCCATCTCTGGCTTCAACGGTGACAACATGCTGTCTCCCTCCACCAACTGCCCCCTGGTACAAGGGTTGG  
GAGCGTGAGGGCAAGAATGGCAAGGTCCTGGCAAGACTCTCCTTGAGGCCATTGACTCCATCGAGCCCCCA  
AGCGTCCCTCCGACAAGCCCCCTCCGTCTTCCCTCCAGGATGTCTACAAGATCGGTGGTATCGGAACGGTCCC  
TGTCGGCCGTGTCGAGACTGGTGTGATCAAGCCCGGCATGGTTGTCACCTTCGCCCCCGCTGGTGTCAACCACT  
GAAGTCAAGTCCGTGAGATGCACCACGAGCAGCTCCCCGAGGGTGTCCCCGGT

>Celery 27-2

TGCCGGTACTGGTGAGTTCGAGGCTGGTATCTCCAAGGATGGCCAGACCCGTGAGCACGCTCTCCTCGCCTAC  
ACCCTGGGTGTCAAGCAGATCATTGTGCGCATCAACAAGATGGACACCACCAAGTGGTCTGAGGAGCGTTACC  
AGGAAATCATCAAGGAGACCTCCAACCTTCATCAAGAAGGTCGGCTACAACCCCAAGAACGTTGCCTTCGTCCC  
CATCTCTGGCTTCAACGGTGACAACATGCTGTCTCCCTCCACCAACTGCCCCCTGGTACAAGGGTTGGGAGCGT  
GAGGGCAAGAATGGCAAGGTCCTGGCAAGACTCTCCTTGAGGCCATTGACTCCATCGAGCCCCCAAGCGTC  
CCTCCGACAAGCCCCCTCCGTCTTCCCTCCAGGATGTCTACAAGATCGGTGGTATCGGAACGGTCCCTGTTCGG  
CCGTGTCGAGACTGGTGTGATCAAGCCCGGCATGGTTGTCACCTTCGCCCCCGCTGGTGTCAACCACTGAAGTC  
AAGTCCGTGAGATGCACCACGAGCAGCTCCCCGAGGGTGTCCCCGGTGAC

### *Alternaria* sp.

#### ITS sequences

>Radish curly 29-6-ITS

ACAGCCTTGCTGAATTATTCACCCTTGTCTTTTGCCTACTTCTTGTTCCTTGGTGGGTTTCGCCCACCACTAG  
GACAAACATAAACCTTTTGTAAATTGCAATCAGCGTCAGTAACAAATTAATAATTACAACCTTTCAACAACGGAT  
CTCTTGGTTCTGGCATCGATGAAGAACGCAGCGAAATGCGATAAGTAGTGTGAATTGCAGAATTCAGTGAATC  
ATCGAATCTTTGAACGCACATTGCGCCCTTTGGTATTCCAAAGGGCATGCCTGTTTCGAGCGTCATTTGTACCC  
TCAAGCTTTGCTTGGTGTGGGCGTCTTGTCTCTAGCTTTGCTGGAGACTCGCCTTAAAGTAATTGGCAGCCG  
GCCTACTGGTTTCGGAGCGCAGCACAAAGTCGCACTCTCTATCAGCAAAGGTCTAGCATCCATTAAGCCTTTTT  
TTCAACTTTTGACCTCGGATCAGGTAGGGATACCCGCTGAACTTAAGCATAT

>Spinach 29-1-ITS

TCTCGGGGTTACAGCCTTGCTGAATTATTCACCCTTGTCTTTTGCCTACTTCTTGTTCCTTGGTGGGTTTCGC  
CCACCACTAGGACAAACATAAACCTTTTGTAAATTGCAATCAGCGTCAGTAACAAATTAATAATTACAACCTTTC  
AACACGGATCTCTTGGTTCTGGCATCGATGAAGAACGCAGCGAAATGCGATAAGTAGTGTGAATTGCAGAAT  
TCAGTGAATCATCGAATCTTTGAACGCACATTGCGCCCTTTGGTATTCCAAAGGGCATGCCTGTTTCGAGCGTC  
ATTTGTACCCTCAAGCTTTGCTTGGTGTGGGCGTCTTGTCTCTAGCTTTGCTGGAGACTCGCCTTAAAGTAA  
TTGGCAGCCGGCCTACTGGTTTCGGAGCGCAGCACAAAGTCGCACTCTCTATCAGCAAAGGTCTAGCATCCATT  
AAGCCTTTTTTTCAACTTTTGACCTCGGATCAGGTAGGGATACCCGCTGAACTTAAGCATAT

### TEF1a sequences

>Radish-2 29-6

TGGTGAGTTCGAGGCTGGTATCTCCAAGGATGGCCAGACTCGTGAGCACGCTCTCCTCGCTTACACCCTCGGT  
GTCAAGCAGCTCATCGTTGCCATCAACAAGATGGACACCACCAAGTGGTCCGAGGAGCGTTACCAGGAGATCA  
TCAAGGAGACCTCCAACCTTCATCAAGAAGGTCGGCTACAACCCCAAGCACGTTCCCTTCGTCCCCATCTCCGG  
TTTCAACGGTGACAACATGATTGAGGCCTCATCCAACCTGCCCCCTGGTACAAGGGTTGGGAGAAGGAGACCAAG  
GCCAAGGCCACTGGTAAGACCCTCCTCGAGGCCATCGACGCCATCGACCCTCCCAGCCGTCCCACCGACAAGC  
CCCTCCGTCTTCCCCTCCAGGATGTTTACAAGATTGGTGGTATTGGCACGGTGCCCGTCGGTTCGTGTGAGAC  
CGGTATCATCAAGGCCGGTATGGTCGTACCTTCGCCCCCGCTGGTGTCAACCACTGAAGTCAAGTCCGTGAG  
ATGCACCACGAGCAGCTACCGAGGGTGT

>Spinach 29-1

TGAGTTCGAGGCTGGTATCTCCAAGGATGGCCAGACTCGTGAGCACGCTCTCCTCGCTTACACCCTCGGTGTC  
AAGCAGCTCATCGTTGCCATCAACAAGATGGACACCACCAAGTGGTCCGAGGAGCGTTACCAGGAGATCATCA  
AGGAGACCTCCAACCTTCATCAAGAAGGTCGGCTACAACCCCAAGCACGTTCCCTTCGTCCCCATCTCCGGTTT  
CAACGGTGACAACATGATTGAGGCCTCATCCAACCTGCCCCCTGGTACAAGGGTTGGGAGAAGGAGACCAAGGCC  
AAGGCCACTGGTAAGACCCTCCTCGAGGCCATCGACGCCATCGACCCTCCCAGCCGTCCCACCGACAAGCCCC

TCCGTCTTCCCCTCCAGGATGTTTACAAGATTGGTGGTATTGGCACGGTGCCCGTCGGTCGTGTCGAGACCGG  
TATCATCAAGGCCGGTATGGTCGTCACCTTCGCCCCCGCTGGTGTCACTGAAGTCAAGTCGTCGAGATG  
CACCACGAGCAGCTACCGAGGGTGTCCCGGTG
