# Supplementary figures and images for: Common but Nonpersistent Acquisitions of Plant Viruses by Plant-Associated Fungi
Source: MDPI journal article supplement (doi:10.3390/v14102279), 2022-10-17

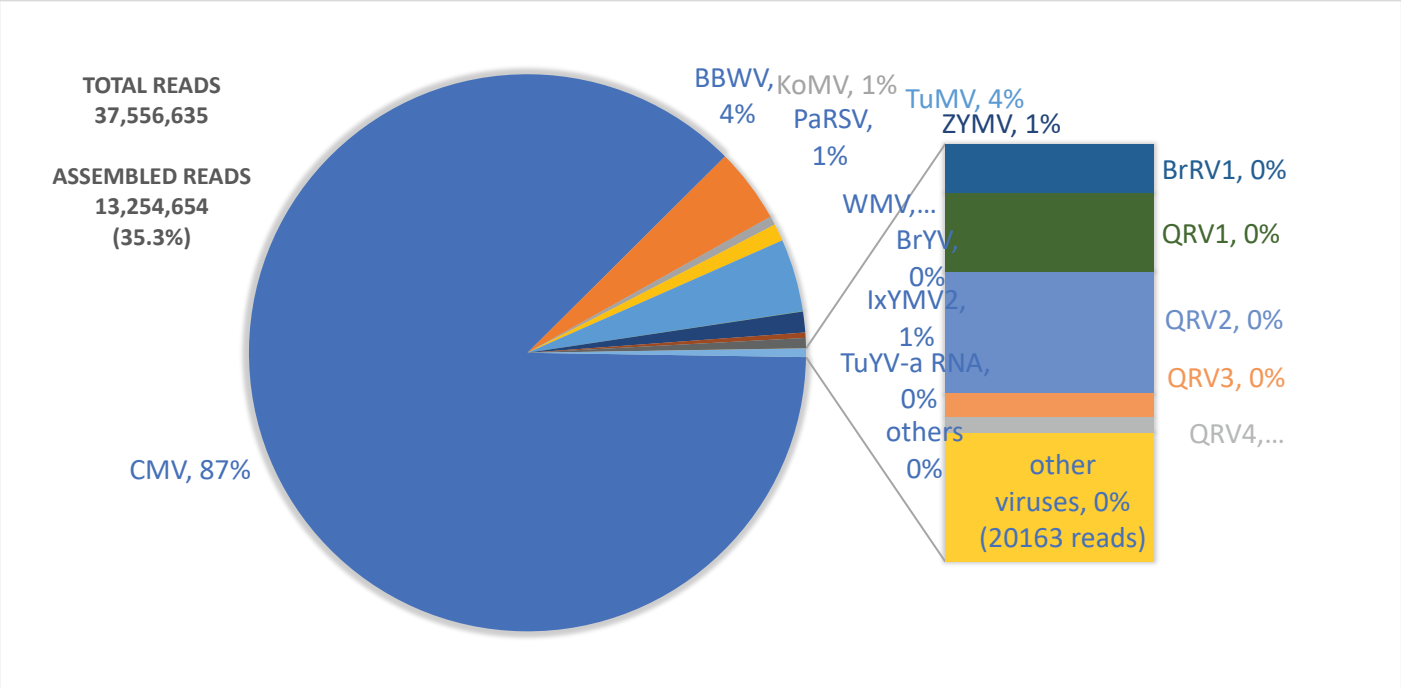

Figure S1. Proportion of the reads that were assembled as the virus-related sequence contigs.

Supplement: s1 [file s1]
